1 Small scale variability in soil moisture drives infection of vulnerable juniper populations by  
2 invasive forest pathogen

3

4 Flora Donald<sup>abd</sup>, Sarah Green<sup>b</sup>, Kate Searle<sup>c</sup>, Nik J. Cunniffe<sup>d</sup>, Bethan V. Purse<sup>a</sup>

5 <sup>a</sup>UK Centre for Ecology and Hydrology, Maclean Building, Benson Lane, Crowmarsh Gifford,  
6 Wallingford, Oxfordshire, OX10 8BB, UK [flodon@ceh.ac.uk](mailto:flodon@ceh.ac.uk) [beth@ceh.ac.uk](mailto:beth@ceh.ac.uk)

7 <sup>b</sup>Forest Research, Northern Research Station, Roslin, Midlothian, EH25 9SY, UK

8 [sarah.green@forestresearch.gov.uk](mailto:sarah.green@forestresearch.gov.uk)

9 <sup>c</sup>UK Centre for Ecology and Hydrology, Bush Estate, Penicuik, Midlothian, EH26 0QB, UK

10 [katrle@ceh.ac.uk](mailto:katrle@ceh.ac.uk)

11 <sup>d</sup>Department of Plant Sciences, University of Cambridge, Downing Street, Cambridge,

12 CB2 3EA, UK [njc1001@cam.ac.uk](mailto:njc1001@cam.ac.uk)

13 **Abstract**

14

15 The oomycete plant pathogen, *Phytophthora austrocedri*, is an aggressive killer of cypress  
16 trees causing severe mortality of Chilean cedar (*Austrocedrus chilensis*) in Argentina since  
17 the 1940s and now common juniper (*Juniperus communis* s.l.) in the UK. Rapid mortality of  
18 key UK juniper populations was first observed in the early 2000s; the causal agent of mortality  
19 was confirmed as *P. austrocedri* in 2012 and the pathogen has now been widely detected -  
20 but is not ubiquitous - in juniper populations across Scotland and England. Although juniper  
21 has a broad distribution across the northern hemisphere, the UK incidence of *P. austrocedri*  
22 remains the only confirmed infection of juniper populations globally. Juniper is an important  
23 species for biodiversity, so it is imperative to understand the abiotic and biotic drivers of  
24 emergent *P. austrocedri* infection to inform detection, containment and conservation strategies  
25 to manage juniper populations across the full extent of its range.

26

27 As management of UK juniper populations is primarily conducted at a local level, we  
28 investigated field scale drivers of disease – in three, geographically separate populations with  
29 different infection histories. Variation in the proportion of juniper showing symptoms -  
30 discoloured or dead foliage – was measured using stratified sampling across along key  
31 environmental gradients within each 100-hectare population, including juniper density  
32 identified from aerial imagery. Potential predictors of infection included altitude, slope,  
33 distance to nearest watercourse, soil moisture (mean percentage volumetric water content),  
34 area of red deer browsing damage and area of commonly associated vascular plant species.  
35 We assessed support in the data for alternative models explaining the spatial distribution of  
36 *P. austrocedri* symptoms using full subset covariate selection and Deviance Information  
37 Criteria (DIC). Despite differences in environmental gradients and infection histories between  
38 populations, area of juniper symptomatic for *P. austrocedri* increased with waterlogging,  
39 increasing with soil moisture in sites where soils had higher peat or clay contents, and  
40 decreasing with proximity to watercourses where sites had shallower, sandier soils. These

41 results are consistent with key drivers identified at both local and landscape scale in Chilean  
42 cedar. Our approach enables identification of site-specific disease management strategies  
43 including prioritisation of inspections in microsites with high soil moisture and promoting  
44 conservation measures such as creation of sites for natural regeneration in drier microsites to  
45 minimise pathogen spread and maximise the resilience of existing juniper populations.

46

## 47 **1.0 Introduction**

48

49 The frequency of plant pathogen introductions outside their native ranges is increasing as  
50 global trade networks expand (Chapman et al., 2017). Successful establishment of pathogens  
51 in these new environments is increasingly being facilitated by degradation of the receiving  
52 communities through habitat fragmentation, species turnover and land use change (Chapman  
53 et al., 2016; Meentemeyer et al., 2011). Economic losses from plant diseases in the natural  
54 environment can result directly from drastic reductions in the extent and viability of host  
55 species, increased cost of detection and containment measures, or from indirect losses such  
56 as destabilisation of ecosystem functioning from loss of biodiversity or negative visual impacts  
57 deterring tourists, driving down house prices and increasing local crime rates (Boyd et al., 2013;  
58 Kovacs et al., 2011; Mills et al., 2011; Troy et al., 2012). While it is appealing to act immediately  
59 to try to control disease outbreaks, the effectiveness of these actions improves as more  
60 information on the processes governing spread becomes available, often relying on  
61 information that does not exist prior to pathogen introduction (Thompson et al., 2018).  
62 Understanding the subset of abiotic and biotic conditions in the invaded range under which  
63 introduced pathogens are likely to infect susceptible host populations can improve targeting  
64 of such interventions and highlight risk factors for outbreaks in uninvaded locations (Cunniffe  
65 et al., 2016).

66

67 The oomycete genus *Phytophthora* contains many pathogenic species that adversely impact  
68 plant health, forestry and agriculture, necessitating expensive, long-term, landscape scale

69 management. Between 1970 and 1989, 11 *Phytophthora* species were introduced to China,  
70 12 to the UK and 16 to the USA (Barwell et al., in review). In the two decades following, the  
71 number of additional species introduced at least doubled in China (20) and the UK (29) and  
72 increased five-fold in the USA (54). While not all of these species established, some of them  
73 have caused serious tree mortality with dramatic landscape and economic consequences. In  
74 Western Australia 282 000 ha of Jarrah (*Eucalyptus marginata*) have been lost to *P. cinnamomi*  
75 (Boyd et al., 2013), while trade of Port Orford cedar (*Chamaecyparis lawsoniana*) in the north-  
76 western United States was almost eliminated by *P. lateralis* (Hansen, 2015). Meanwhile,  
77 millions of coast live oak (*Quercus agrifolia*) and tanoak (*Notholithocarpus densiflorus*) trees  
78 in California and Oregon, and 18 000 ha of Japanese larch (*Larix kaempferi*) in the UK and  
79 Ireland have been killed by *P. ramorum* (Meentemeyer et al., 2011; O'Hanlon et al., 2018;  
80 Peterson et al., 2014).

81  
82 First described in 2007, *Phytophthora austrocedri* Gresl. & E. M. Hansen has caused  
83 widespread mortality of Chilean cedar (*Austrocedrus chilensis*) in Argentina since the 1940s  
84 (Greslebin et al., 2007; Greslebin and Hansen, 2010). The pathogen is homothallic and is  
85 potentially spread by both asexual, motile zoospores dispersed through any form of moving  
86 water, and sexually produced, thick-walled oospores that can remain viable for extended  
87 periods of time and be translocated in soil (Green et al., 2015; Henricot et al., 2017a). Infection  
88 usually starts in the roots before spreading into the cambium and phloem, creating necrotic  
89 lesions that can extend to the full width of each layer, starving whole branches, trunks or trees  
90 of water and nutrients causing rapid defoliation and mortality (Green et al., 2015).

91  
92 Symptoms were first brought to the attention of UK plant pathologists in the mid-2000s, when  
93 significant numbers of symptomatic juniper (*Juniperus communis* L. s. l.) could be observed  
94 in two of the larger populations (Glenartney and Haweswater), but *P. austrocedri* was not  
95 confirmed as the causal agent of mortality until 2012 following isolation and confirmation of  
96 Koch's postulates (Green et al., 2012). In the UK the pathogen is present as a single genetic

97 lineage exhibiting no diversity in nucleic and mitochondrial loci, suggesting introduction and  
98 spread of a single clonal strain (Henricot et al., 2017a). The extent of juniper decline varies,  
99 with some populations showing wholesale dieback of bushes compared to others with only  
100 localised patches of symptoms, suggesting populations have been infected at different times  
101 and/or different site conditions promote different rates of spread.

102

103 Although interceptions of infected cypress and juniper trees in Scotland, England and  
104 Germany confirm that infected material is being traded (Green et al., 2015; Werres et al.,  
105 2014) the outbreak in British juniper populations in the wider environment remains the only  
106 detected infection of a natural host population outside Argentina (Green et al., 2012). Globally,  
107 juniper has a large, circumboreal distribution extending across the northern hemisphere but  
108 as no investigation of environmental drivers of infection has been undertaken, the proportion  
109 of juniper vulnerable to *P. austrocedri* infection is unclear.

110

111 In the UK, juniper has a wide but discontinuous distribution occupying much of Scotland and  
112 northern England and remaining as scattered populations in southern England, Wales and  
113 Northern Ireland (Fig. 1). Populations are undergoing long term declines in most areas as a  
114 result of burning, afforestation, over-grazing, under-grazing, increased levels of diffuse  
115 pollution (particularly nitrogen) and poor germination following warmer winter temperatures  
116 (Broome and Holl, 2017; Clifton et al., 1997; Long and Williams, 2007; Sullivan, 2003;  
117 Verheyen et al., 2009; Walker et al., 2017; Ward and Shellswell, 2017). It is difficult to estimate  
118 the area of juniper lost specifically to disease but infected populations are widespread across  
119 Scotland and England, where juniper occupancy of 10 x 10 km cells reportedly declined by 23  
120 % and 44 % respectively between 2000 and 2016 (Plantlife, 2015).

121

122 The societal and environmental value of woodlands was recognised in the 2014 Tree Health  
123 Management Plan for England as several times higher than the commercial value of forestry  
124 (Department for Environment Food & Rural Affairs, 2014a) and the Scottish Plant Health

125 strategy identifies plant health in the natural environment as integral to the £1.8 billion rural  
126 economy (The Scottish Government, 2016). Loss of UK juniper populations to *P. austrocedri*  
127 could be significant as the species is highly ecologically important as a dominant component  
128 of many habitats including woodland, scrub, heath, dune and calcareous grassland, as a nurse  
129 species ameliorating environmental conditions and protecting other seedlings from herbivory,  
130 a rare source of winter food and nesting habitat for birds, and a host of many specialist fungi  
131 and insects (Thomas et al., 2007; Ward and Shellswell, 2017; Wilkins and Duckworth, 2011).

132

133 As juniper occupies such a broad variety of habitats, trees are subject to different  
134 environmental conditions and land uses that may alter their susceptibility to disease.  
135 Epidemics occur across a range of spatial scales, arising first as microscopic infections that  
136 can spread to whole plants, populations and landscapes (Gilligan and Van Den Bosch, 2008).  
137 Successful disease control requires matching of the scale of management to the inherent  
138 scale of spread as mediated by host population connectivity and pathogen dispersal distances  
139 (Cunniffe et al., 2016). Transmission of soil borne pathogens is likely to occur across short  
140 distances resulting in highly aggregated infection prevalence and spatially variable exposure  
141 to pathogens within host populations (Penczykowski et al., 2018). However, very few studies  
142 of soil borne Phytophthoras investigate spread at field scale and those that do use small (<  
143 20) sample sizes (La Manna and Matteucci, 2012; La Manna and Rajchenberg, 2004a; Nagle  
144 et al., 2010; Tippet et al., 1989).

145

146 We measured juniper symptoms in 147 quadrats across three, geographically separate juniper  
147 populations with contrasting infection intensities and analysed the data using Generalised  
148 Linear Mixed Models (GLMMs) to compare drivers of spatial variation in symptoms at field  
149 scale. Correlative approaches, such as GLMMs, are appropriate tools to perform such  
150 exploratory analyses as they can accommodate a broad range of potential covariates as is  
151 necessary when drivers of pathogen dispersal and spread in the invaded range are poorly  
152 understood (Purse and Rogers, 2009).

153

154 We expected *P. austrocedri* infection of juniper would exhibit similar responses to  
155 environmental covariates as infected Chilean cedar, which occupies a similarly diverse range  
156 of ecotypes. Population level studies in Argentina found area of foliage symptoms increased  
157 in microsites situated at low altitude with poor soil drainage, flat slopes, close proximity to  
158 watercourses and fine soil textures, with greater infection of female cedars because they  
159 typically occupy wetter microsites (Baccalá et al., 1998; V. a El Mujtar et al., 2012; La Manna  
160 et al., 2008; L. La Manna and Rajchenberg, 2004; Ludmila La Manna and Rajchenberg, 2004).

161

162 In addition, we expected that the area of symptoms in juniper would increase with i) increasing  
163 host density, as inoculum production is likely to increase with availability of host tissue and  
164 dispersal distances between roots will be reduced (Anderson and May, 1986; Dillon et al.,  
165 2014); and ii) increased ungulate herbivory, and proximity to deer and sheep tracks and lie-  
166 ups, as evidence for increased exposure to inoculum transported in soil on herbivore hooves  
167 (Jules et al., 2002; La Manna et al., 2013).

168

169 Given the contrast in abiotic and biotic conditions occupied by each population, we further  
170 expected that the relative importance of the investigated covariates would vary between  
171 locations and require site specific strategies to manage individual juniper populations.

172 **2.0 Methods**

173

174 **2.1 Study Areas**

175

176 Three infected juniper populations from where *P. austrocedri* had previously been isolated  
177 (Henricot et al., 2017) were selected to best represent the diversity of climatic, topographic  
178 and edaphic conditions occupied by juniper. Two populations are located in Scotland: one in  
179 Perthshire (P) and one in the Cairngorms (C), and one population is situated in the Lake  
180 District (LD) in the north of England. In all three locations, the juniper population is a  
181 component feature of a Special Area of Conservation designated habitat and a qualifying  
182 interest of a Site of Special Scientific Interest (SSSI; Fig. 1).

183

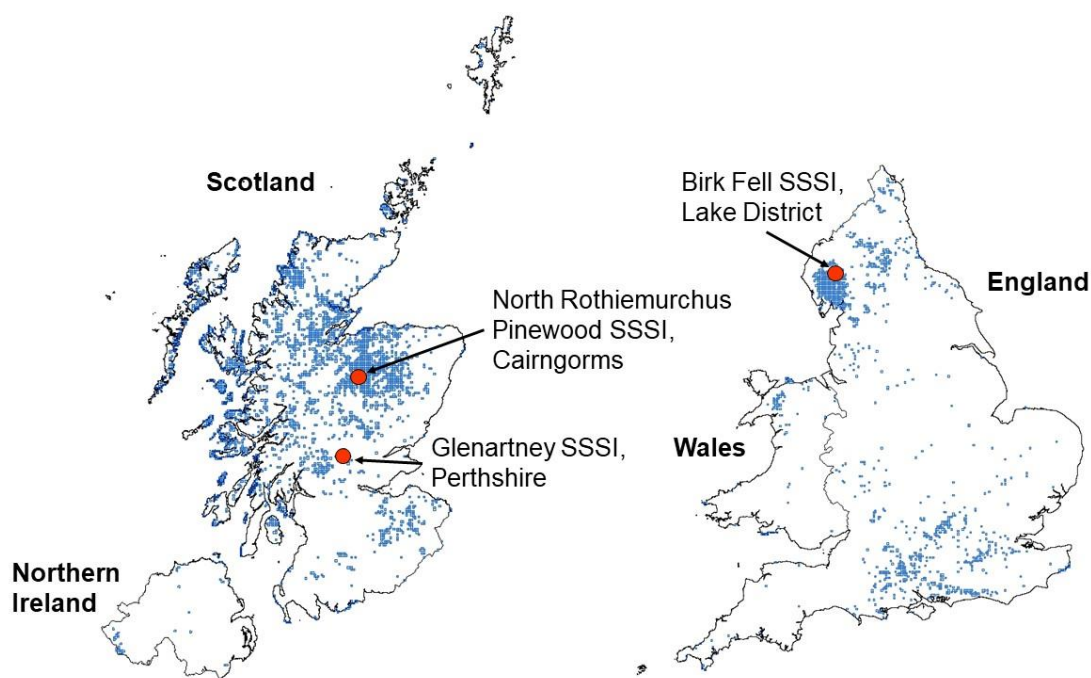

184

185 **Figure 1.** SSSI name and location of the three juniper study populations mapped against the  
186 distribution of UK juniper (*Juniperus communis* s. l.) at 2 x 2 km resolution (shown in blue)  
187 recorded during the period 2000 – 2017 (Botanical Society of Britain and Ireland, 2017).

188



189 Each population contained 100 – 130 hectares of continuous juniper cover. The greatest area  
190 of mortality was observed in the Perthshire population; symptoms were first reported in 2004  
191 and represented a 20% decline in area of live juniper trees compared to a 1983 baseline  
192 survey (Tene et al., 2007). The precise duration of infection in the Lake District and  
193 Cairngorms populations is unknown, but *P. austrocedri* symptoms were first noted after 2010,  
194 and a lower proportion of symptomatic juniper was observed at both sites potentially  
195 consistent with a more recent introduction.

196

## 197 **2.2 Quadrat stratification**

198

199 Juniper was sampled using 10 x 10 m quadrats from pre-selected locations stratified according  
200 to the area and density of juniper, altitude, slope and distance to watercourses. A 2010  
201 distribution map of the Perthshire juniper population derived from 15 cm full colour (RGB) and  
202 false colour infrared (CIR) imagery was provided by Scottish Natural Heritage (Whittome,  
203 2010) and distribution maps of the remaining two populations were classified from 25 cm RGB  
204 imagery supplied for 2010 by NeXTPerspectives™. The classification methods are described  
205 in Appendix A.

206

207 To capture differences in juniper abundance and density, the area of juniper predicted by the  
208 image classifications was measured in 10 x 10 grid cells using landscape class statistical  
209 functions in the SDMTools package (Van der Wal et al., 2014) implemented in R v. 3.4.2 (R  
210 Core Team, 2017). To understand if each 10 x 10 m cell was isolated from other juniper stands  
211 or part of a larger stand, the area of juniper in 30 x 30 m including each 10 x 10 m grid cell  
212 was also calculated, producing distributions of juniper % cover at each scale for each study  
213 population (Fig. 2). These distributions were used to devise eight categories to describe  
214 juniper abundance that could be easily identified in the field. Each 10 x 10 m cell containing  
215 juniper was assigned to one of four categories describing juniper % cover in 10 x 10 m ( $\leq 10$ ,  
216 11-25, 26-50,  $> 51$  %) and to one of two categories characterising the area of juniper

217 surrounding the 10 x 10 m cell as isolated from ( $\leq 20\%$ ), or contiguous with ( $> 21\%$ ), juniper  
218 growing in the wider 30 x 30 m.  
219

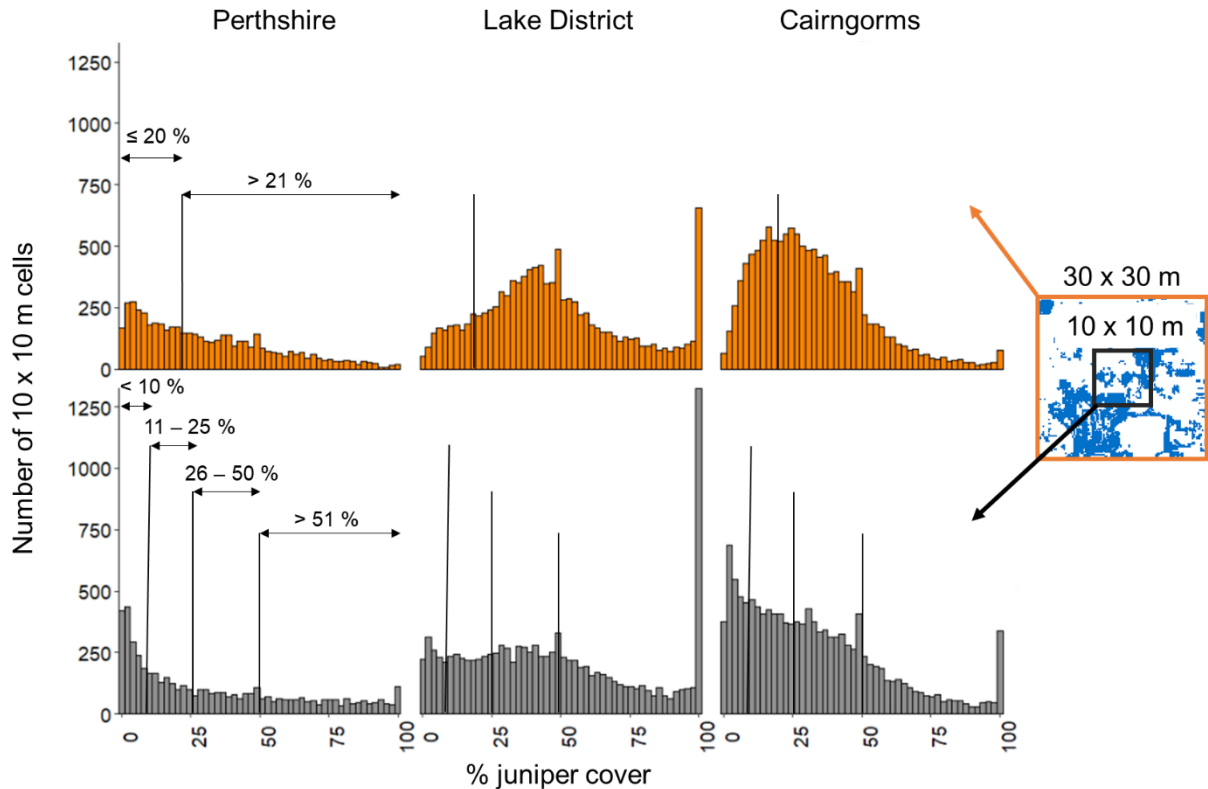

220

221 **Figure 2.** Number of 10 x 10 m cells per study population with estimated % cover of juniper  
222 (shown in blue) across 10 x 10 m (grey) cells and the surrounding 30 x 30 m (orange).  
223 Thresholds used to divide juniper % cover into categories at each scale are marked with  
224 black lines.

225

226 Layers of slope and aspect were calculated from the resampled NeXTPerspectives™ 10 m  
227 DEM using the *terrain* function in the raster package (Hijmans, 2016). Slope, aspect and  
228 altitude were then extracted to the centroid of each 10 x 10 m grid cell containing juniper.  
229 Euclidean distance (m) from the nearest watercourse to each 10 m grid cell centroid was  
230 measured from a rasterised version of the 50 m digital rivers network (Moore et al., 2000).

231

232 Fifty 10 x 10 m cells per study population were randomly selected for sampling in proportion  
233 to the total number of cells assigned to each abundance category. This was repeated five  
234 times for each population. After each run, selected cells were plotted across the altitudinal,  
235 slope and watercourse proximity gradients occupied by juniper at each location and the  
236 selection that captured the widest distribution of samples along each of the three gradients  
237 was chosen as sampling locations.

238

### 239 **2.3 Survey of spatial patterns in juniper symptoms**

240

241 Quadrat sampling was carried out over five days at each location in October 2017. Quadrats  
242 were geo-located using ArcPad v. 10.2 on a Panasonic FZ-GI tablet with GPS accuracy to 3  
243 m. To minimise transference of inoculum across populations, areas of high and low infection  
244 were visited on different days and all equipment breaking the soil surface (e.g. marker poles,  
245 soil moisture probes) was disinfected between quadrats. All other equipment was thoroughly  
246 disinfected between study populations.

247

248 Juniper quadrats were placed as close to pre-selected locations as was possible to meet the  
249 abundance criteria by estimating the area of juniper in 10 x 10 m and scoring abundance in  
250 30 x 30 m as a binary measure of more or less than 20 %. The area of symptomatic juniper  
251 was measured as a fraction of the total area of juniper present in each quadrat, where  
252 symptoms constituted foliage discolouration and dead needles (retained or dropped) that  
253 extended to a minimum of a whole branch and did not result from either browsing or  
254 mechanical damage. Where a distinctive phloem lesion typical of *P. austrocedri* could be  
255 found, a 500 mg tissue sample was collected from one representative symptomatic tree per  
256 quadrat. The sampled tissue was stored at - 20 °C until quantitative real-time PCR (qPCR)  
257 could be carried out following the protocol described in Mulholland et al. (2013) to verify the  
258 consistent presence of *P. austrocedri* across each population.

259

## 260 **2.4 Abiotic and biotic predictors**

261

262 We measured a suite of potential abiotic and biotic predictors of spatial patterns in  
263 *P. austrocedri* symptoms and included these in statistical models for each population (Table  
264 1).

265

266 The following predictors were measured in each field quadrat. The binary observation of  $\leq 20$   
267 % or  $> 21$  % juniper cover across 30 x 30 m to distinguish between quadrats situated in  
268 isolated or contiguous juniper stands was included in the model as juniper “density”. The area  
269 of juniper bearing berries was used to estimate the area of female juniper. Area of herbivore  
270 damage was measured as the area of bark stripping plus any resulting dead branches / stems  
271 (i.e. mechanical breakage from wind or snow damage was excluded). This metric was not  
272 included in Cairngorm models as herbivory was only detected in nine quadrats, encompassing  
273 an area greater than 10 cm<sup>2</sup> in only three quadrats.

274

275 Soil moisture was measured as % volumetric water content (VWC) using a FieldScout TDR  
276 300 probe. Shallow soil and surface rock only permitted measurements using the 3.8 cm depth  
277 setting across the Lake District population, whereas measurements were collected at 20 cm  
278 depth in Perthshire and the Cairngorms. Measurements were collected from i) areas within  
279 each quadrat where juniper was absent, ii) under asymptomatic juniper and iii) under  
280 symptomatic juniper. An equal number of measurements (minimum four) was collected from  
281 each category present, resulting in eight to twelve point sample measurements from which  
282 mean soil moisture was calculated (% VWC).

283

284 Area of vascular plant taxa present in each quadrat was recorded according to a target list  
285 (Appendix B) of taxa chosen to indicate placement of microsites along soil moisture, nitrogen  
286 and pH gradients.

287

288 Mapping in the field was carried out using the tracking function in ARCPad, to record any  
289 watercourses additional to the 50 m digital rivers network (Moore et al., 2000). These were  
290 merged with the original dataset and used to recalculate the watercourse proximity (m) metric  
291 for each quadrat. Clearly visible deer and sheep tracks were also mapped and proximity to  
292 sampled quadrat centroids measured as an alternative way to measure the risk of inoculum  
293 transference to juniper from herbivores, but stocking density and ground condition only  
294 permitted collection of a reliable dataset from Perthshire.

---

295

296 **Table 1.** List of covariates included in full subset model selection for each population

297 (P = Perthshire, LD = Lake District, C = Cairngorms).

298 Number of sampled quadrats: P = 51, LD = 46, C = 50.

299

| Measurement category                                                          | Specific measurement                                                                                                                                                                                                                                | Population |    |   |   |
|-------------------------------------------------------------------------------|-----------------------------------------------------------------------------------------------------------------------------------------------------------------------------------------------------------------------------------------------------|------------|----|---|---|
|                                                                               |                                                                                                                                                                                                                                                     | P          | LD | C |   |
| Juniper density<br>30 x 30 m quadrat                                          | ≤ 20 % or > 21 % juniper cover                                                                                                                                                                                                                      | X          | X  | X |   |
| Juniper metrics<br>10 x 10 m quadrat                                          | Area of juniper bearing berries (m <sup>2</sup> )                                                                                                                                                                                                   | X          | X  | X |   |
|                                                                               | Area of herbivore damage (m <sup>2</sup> )                                                                                                                                                                                                          | X          | X  |   |   |
| Soil moisture                                                                 | Mean of point samples across quadrat (% VWC)                                                                                                                                                                                                        | X          | X  | X |   |
| Vascular plant indicators                                                     | Area of individual target taxa (m <sup>2</sup> )                                                                                                                                                                                                    | X          | X  | X |   |
| Watercourse proximity                                                         | Euclidean distance from quadrat centroid to nearest mapped river (m)                                                                                                                                                                                | X          | X  | X |   |
| Grazing activity                                                              | Distance from quadrat centroid to nearest deer or sheep track (m)                                                                                                                                                                                   | X          |    |   |   |
| Topographic metrics<br>extracted to 10 x 10 m<br>quadrat centroid             | Altitude (m)                                                                                                                                                                                                                                        | X          | X  | X |   |
|                                                                               | Slope (°)                                                                                                                                                                                                                                           | X          | X  | X |   |
|                                                                               | Aspect (°)                                                                                                                                                                                                                                          |            |    | X |   |
| Soil type (250 m<br>resolution) extracted to<br>10 x 10 m quadrat<br>centroid | <b>Perthshire:</b><br>Brown forest Balrownie<br>Brown forest Gourdie<br>Organic soil, peaty gleys<br>Non-calcareous gleys<br>Peaty gleys Balrownie                                                                                                  | X          |    |   |   |
|                                                                               | <b>Cairngorms:</b><br>Humus-iron podzols; some brown forest soils,<br>noncalcareous gleys and peaty gleys<br>Humus-iron podzols; some peaty gleys and humic gleys                                                                                   |            |    | X |   |
|                                                                               | <b>Perthshire:</b><br>W19 <i>Juniperus communis</i> woodland<br>Acid grasslands (U4, U20, U24)<br>Mires (M10, M23)<br>Mosaic (U5, M15)                                                                                                              |            | X  |   |   |
|                                                                               | <b>Cairngorms:</b><br>H12 <i>Calluna vulgaris</i> – <i>Vaccinium myrtillus</i> heath<br>W18 Scots pine woodland with heather<br>U4 <i>Festuca ovina</i> - <i>Agrostis capillaris</i> - <i>Galium saxatile</i><br>grassland<br>Coniferous plantation |            |    |   | X |

300 .

301

302 The remaining covariates were obtained from existing GIS datasets. Altitude, slope and aspect  
303 were extracted to each quadrat centroid from the resampled NeXTPerspectives™ 10 m layers  
304 prepared for the plot stratification. Aspect was not included in the Perthshire or Lake District  
305 models as more than 60 % of quadrats at each location were clustered in the same octant.

306

307 The soil type underlying each quadrat centroid was extracted from 250 m resolution datasets,  
308 obtained from a digitised version of the soil map produced by Forbes (1984), the Soilscales  
309 dataset (Farewell et al., 2011) and the National Soil Map of Scotland (James Hutton Institute,  
310 2011) for the Perthshire, Lake District and Cairngorms populations respectively. Soil type was  
311 omitted from model selection for the Lake District population as at 250 m resolution all of the  
312 quadrats were placed in “freely draining acid loamy soils over rock” (Farewell et al., 2011).

313

314 To test if a broader description of the vegetative community is a better predictor of  
315 *P. austrocedri* symptoms, because it captures more information about edaphic conditions than  
316 the presence of individual taxa, National Vegetation Classification (NVC) community data,  
317 supplied by Scottish Natural Heritage (2017), was included as a covariate for the Perthshire  
318 and Cairngorms populations (Table 1). The eight Perthshire communities were simplified to  
319 these four broad types (Table 1), amalgamated as follows: acid grasslands (U4 *Festuca ovina*  
320 - *Agrostis capillaris* - *Galium saxatile*; U20 *Pteridium aquilinum* - *Galium saxatile*; U24  
321 *Arrhenatherum elatius* - *Geranium robertianum*), mires (M10 *Carex dioica* - *Pinguicula*  
322 *vulgaris*; M23 *Juncus effusus/acutiflorus* - *Galium palustre*) and mosaic communities  
323 suggesting transition from drier to wetter soil (U5 *Nardus stricta* - *Galium saxatile*; M15  
324 *Trichophorum germanicum* - *Erica tetralix* wet heath) (Rodwell, 1991). No NVC data was  
325 released for the Lake District population.

326

327

328

329

## 330 2.5 Model specification

331

332 To investigate the relationships between the area of *P. austrocedri* symptoms and  
333 environmental covariates, we used a Bayesian beta-binomial Generalised Linear Mixed Model  
334 (GLMM) fitted using the Integrated Nested Laplace Approximation (INLA) method with the R-  
335 INLA package (Rue et al., 2009) implemented in R v. 3.4.2 (R Core Team, 2017).

336

337 Models were fitted to the number of square metres of symptomatic juniper in each 10 x 10 m  
338 quadrat. Using the beta-binomial distribution enabled us to take account of the area of juniper  
339 in each cell while allowing the probability of infection to have extra variation associate with  
340 spatial clustering of symptoms (overdispersion), thereby accounting for the high frequency of  
341 quadrats that contain wholly asymptomatic or symptomatic juniper (Hughes and Madden,  
342 1993).

343

344 In particular, our model used the  $q = 12$  environmental covariates for the  $i^{\text{th}}$  location  
345  $\{x_{j,i} | 1 \leq j \leq 16\}$  to estimate the mean probability of infection via a logit link function

$$346 \text{logit}(\mu_i) = \beta_0 + \beta_1 x_{1,i} + \dots + \beta_q x_{16,i},$$

347 in which  $\beta_0$  is an intercept and  $\beta_j$  is the regression coefficient for the  $j^{\text{th}}$  predictor. This estimate  
348 of the mean probability is then used to predict the area of symptomatic juniper in the  $i^{\text{th}}$  location  
349 ( $\eta_i$ ) via

$$350 \eta_i \sim \text{beta-binomial}(\mu_i, \gamma, N_i),$$

351 in which  $N_i$  is the total area of juniper in the  $i^{\text{th}}$  cell ( $\text{m}^2$ ) and  $\gamma$  is the overdispersion parameter  
352 of the beta-binomial distribution (that was assumed to be constant across all cells at each  
353 site). In our Bayesian estimation procedure all regression parameters, including the intercept,  
354 were assumed to have minimally informative priors of the form

$$355 \beta_q \sim \text{Normal}(0, 1/0.001).$$

356



## 357 **2.6 Model selection**

358

359 All covariates were centred and standardized prior to model fitting and no pairs of covariates  
360 used in any models were correlated with a Pearson  $r^2$  value  $\geq 0.6$  (Appendix D). Models were  
361 run in two stages. We first performed a full subset selection using all possible combinations of  
362 covariates marked against each population (Table 1) except the vascular plant indicators,  
363 producing 1023 models for both Perthshire and the Cairngorms, and 127 models for the Lake  
364 District, which had seven as opposed to ten covariates.

365

366 Model fit was compared using the Deviance Information Criterion (DIC), a Bayesian  
367 generalisation of the Akaike Information Criterion (AIC) derived as the mean deviance  
368 adjusted for the estimated number of parameters in the model to provide a measure of out-of-  
369 sample predictive error (Gelman and Hill, 2006). The model with the lowest DIC is the model  
370 with the most support in the data, but the set of models with DICs within two units of the top  
371 model DIC are considered to have equivalent support in the data and formed the “top model  
372 set”.

373

374 The area of each vascular plant indicator, present in ten or more quadrats at each population,  
375 were then added to the formulae for the top model set per population to assess (using DIC) if  
376 the addition of any one indicator improved model fit. Nine additional models were run for  
377 Perthshire and the Lake District, and ten for the Cairngorms (Table 3).

378

379 To assess the importance of covariate effects, we summarised marginal posterior distributions  
380 using 95 % (0.025 and 0.975 quantiles of the posterior distribution) Bayesian credible intervals  
381 (BCI). The relationship between each covariate and the area of symptoms is considered  
382 strongest where BCI do not bridge zero, very strong when  $\geq 0.95$ , strong when  $\geq 0.90 - 0.94$ ,  
383 and weak when  $\geq 0.80 - 0.89$  of the BCI are above or below zero. Where a strong or very  
384 strong relationship was found between the area of symptoms and a covariate, we report the

385 percentage of the posterior predicted data that overlaps zero as calculated in R v. 3.5.2 (R  
386 Core Team, 2018) using the *rollmean* function in the zoo package (Zeileis and Grothendieck,  
387 2005).

388

389 Model validation was performed using root mean-square error (RMSE) calculated between  
390 the predicted posterior mean values and the corresponding mean sampled area of  
391 symptomatic juniper. The residuals of the top models were checked for spatial autocorrelation  
392 using Moran's I statistic implemented using the *correlog* function in R package ncf v 1.2.8  
393 (Bjornstad, 2019). Pairs of plots were divided into different distance bins at 100 m intervals  
394 between 0 and the maximum distance between plot pairs for each site and the Moran's I value  
395 was then calculated for each distance bin. One hundred paired distances were randomly  
396 resampled per distance bin to assess Moran's I correlation significance (Appendix D).

397

398

## 399 **3.0 Results**

400

### 401 **3.1 Prevalence of symptoms of *P. austrocedri* infection**

402

403 Fifty-five percent of juniper surveyed in the Perthshire population showed symptoms  
404 compared to 28 % in the Lake District and 23 % in the Cairngorms populations, consistent  
405 with a possible earlier pathogen introduction in Perthshire (Fig. 3). Though quadrats containing  
406 no symptomatic juniper were found in all three populations, the mean area of symptomatic  
407 juniper found in Perthshire quadrats was  $19 \pm 20 \text{ m}^2$  out of a mean  $34 \pm 28 \text{ m}^2$  area of juniper,  
408 compared to a mean of  $7 \pm 11 \text{ m}^2$  of symptomatic juniper in quadrats from the Cairngorms  
409 population where the mean juniper cover found per quadrat was similar ( $33 \pm 22 \text{ m}^2$ ). The  
410 mean area of juniper in the Lake District quadrats was higher ( $44 \pm 27 \text{ m}^2$ ) with an intermediate  
411 mean area of symptomatic juniper ( $13 \pm 18 \text{ m}^2$ ).

412

413 Because detection of symptomatic lesions is limited to above-ground live tissue, qPCR results  
414 are less reliable indicators of infection than symptoms. However, positive qPCR results were  
415 obtained across the full extent of each population giving confidence that site-wide  
416 observations of symptoms result from *P. austrocedri* infection (Appendix C).

417

418 The mean, standard deviation and range of covariates measured and tested in models across  
419 all three populations is shown in Table 2. The Perthshire population is characterised by  
420 fragmented juniper stands, only 35 % of quadrats contained more than 21 % juniper cover  
421 across 30 x 30 m compared to c. 70 % in the Lake District and Cairngorm populations where  
422 juniper grows in denser stands (Fig. 3, Table 2). Perthshire population quadrats were never  
423 further than 174 m from a river or drain, compared to 840 and 820 m in the Lake District and  
424 Cairngorms populations respectively (Fig. 3, Table 2). The Lake District population occupied  
425 the largest range of altitude (234 m compared to 132 m in Perthshire and 78 m in the  
426 Cairngorms) with up to 45° slopes compared to just 20° in both Scottish populations (Fig. 3;

427 Table 2). The Cairngorms population had the driest soil conditions across the quadrats (Table  
428 2) with mean soil moisture of 33 % VWC, which is 27 % and 48 % drier than the mean soil  
429 moisture found across Lake District and Perthshire quadrats respectively.

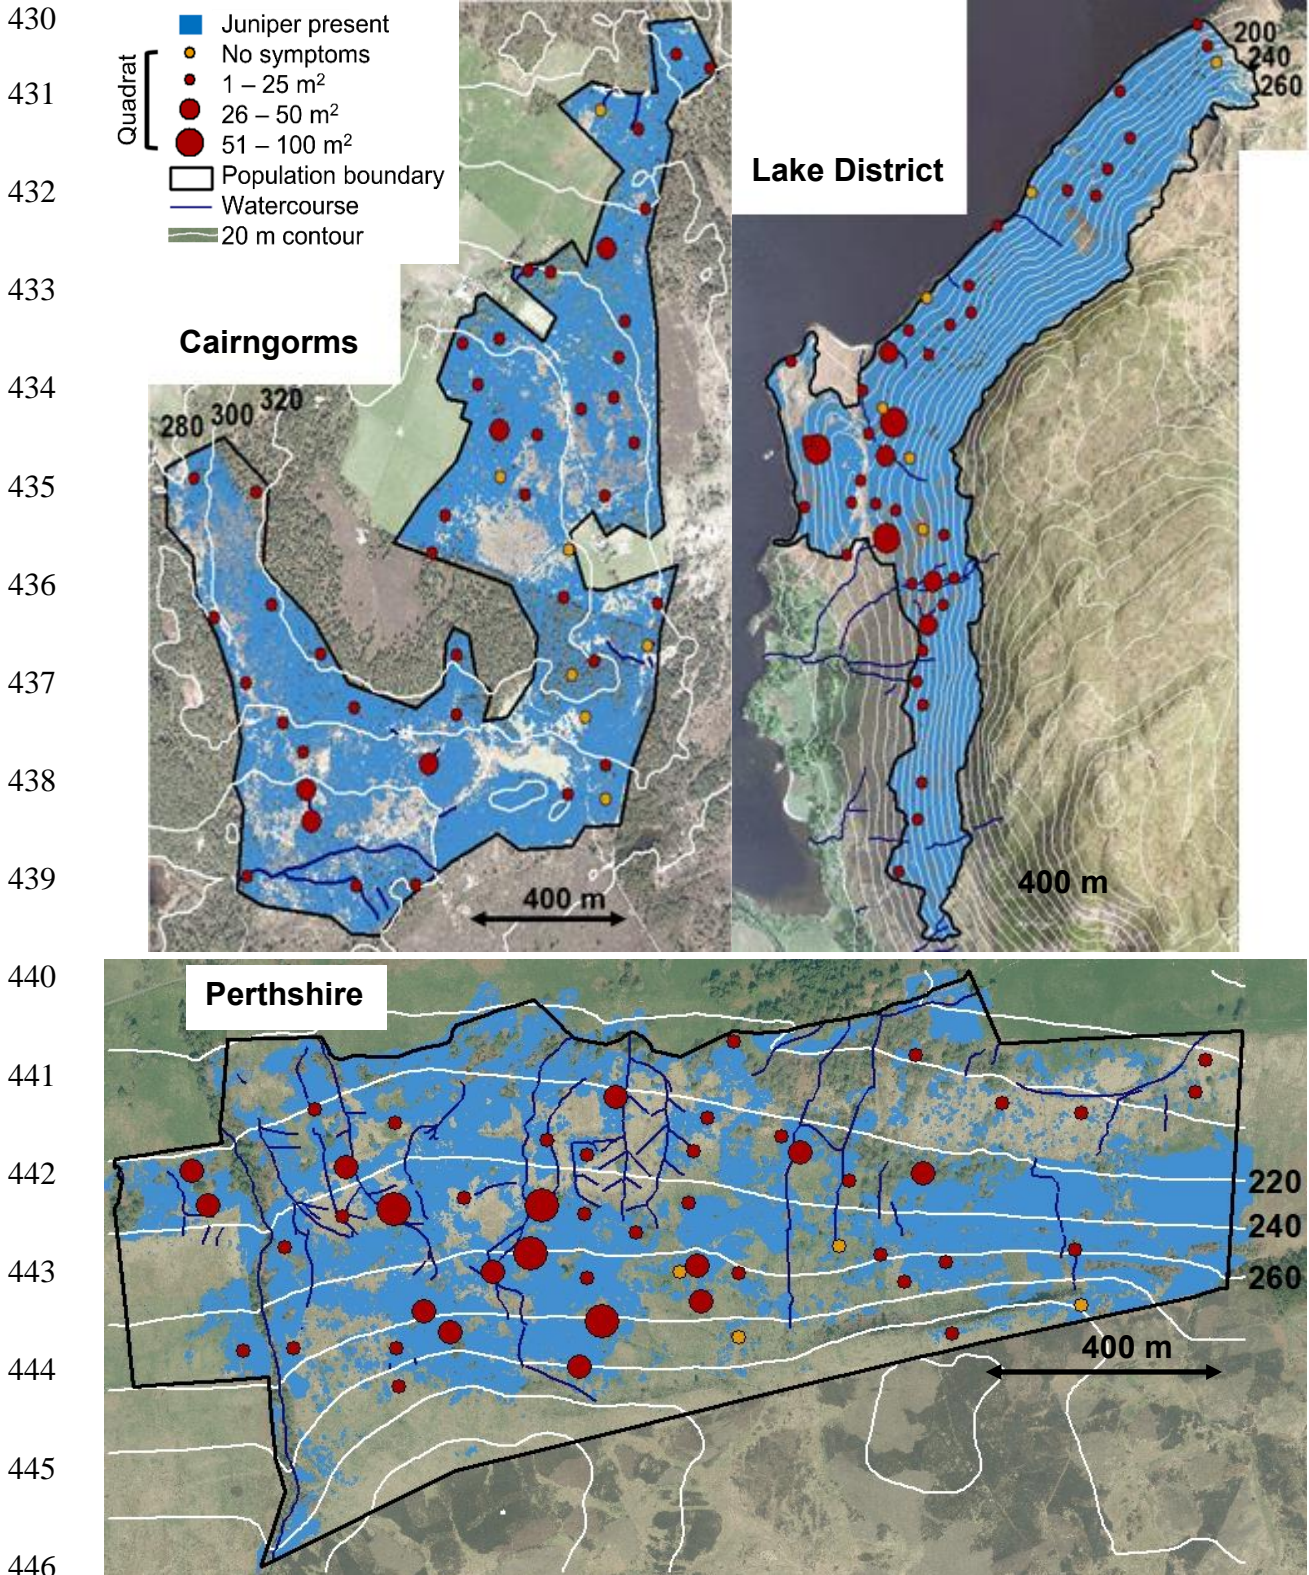



447 **Figure 3.** Map of surveyed juniper populations showing the distribution of juniper in relation  
448 to the watercourse, altitude and slope covariates used to stratify sampling. The distribution  
449 of samples, collected in 10 x 10 m quadrats, is shown with circles coloured orange where no  
450 *P. austrocedri* symptoms were found and red where symptoms were present. Circle size  
451 corresponds to categories representing the area of symptoms estimated in each quadrat.

452 Imagery licensed to UK Centre for Ecology & Hydrology for PGA through Next

453 Perspectives™

454

455 **Table 2.** Comparison of surveyed juniper population covariate means  $\pm$  1 s.d., and ranges,  
 456 measured from 10 x 10 m quadrats. P = Perthshire, LD = Lake District and C = Cairngorms  
 457 study populations. Only numerical / binary coded variables included in the first stage of  
 458 GLMM modelling (i.e. excluding species indicators) are displayed. Covariates not included in  
 459 models for specific populations are greyed out.

| Covariate                                                                           | Mean $\pm$ s.d.per quadrat |               |               | Range per quadrat |           |           |
|-------------------------------------------------------------------------------------|----------------------------|---------------|---------------|-------------------|-----------|-----------|
|                                                                                     | P                          | LD            | C             | P                 | LD        | C         |
| Area of symptomatic juniper (m <sup>2</sup> )                                       | 19 $\pm$ 20                | 13 $\pm$ 18   | 7 $\pm$ 11    | 0 - 79            | 0 - 70    | 0 - 45    |
| Area of juniper (m <sup>2</sup> )                                                   | 34 $\pm$ 28                | 44 $\pm$ 27   | 33 $\pm$ 22   | 2 - 99            | 1 - 90    | 1 - 80    |
| Juniper density<br>(% quadrats nested in<br>30 x 30 m with > 21<br>% juniper cover) | 35                         | 72            | 70            | NA                | NA        | NA        |
| Area of juniper bearing berries (m <sup>2</sup> )                                   | 10 $\pm$ 12                | 9 $\pm$ 15    | 4 $\pm$ 9     | 0 - 49            | 0 - 66    | 0 - 49    |
| Area of herbivore damage (m <sup>2</sup> )                                          | 2 $\pm$ 8                  | 0 $\pm$ 1     | 0 $\pm$ 1     | 0 - 50            | 0 - 3     | 0 - 7     |
| Mean soil moisture (% VWC)                                                          | 45 $\pm$ 12                | 63 $\pm$ 17   | 33 $\pm$ 9    | 28 - 84           | 33 - 108  | 15 - 52   |
| Watercourse proximity (m)                                                           | 42 $\pm$ 37                | 144 $\pm$ 209 | 240 $\pm$ 193 | 1 - 174           | 0 - 840   | 2 - 820   |
| Grazing activity (m)                                                                | 16 $\pm$ 16                | 72 $\pm$ 68   | 31 $\pm$ 49   | 0 - 70            | 1 - 212   | 1 - 213   |
| Altitude (m)                                                                        | 250 $\pm$ 30               | 248 $\pm$ 63  | 303 $\pm$ 21  | 182 - 314         | 150 - 384 | 256 - 334 |
| Slope (°)                                                                           | 11 $\pm$ 4                 | 32 $\pm$ 7    | 6 $\pm$ 4     | 5 - 23            | 15 - 45   | 1 - 20    |
| Aspect (°)                                                                          | 158 $\pm$ 145              | 276 $\pm$ 53  | 174 $\pm$ 99  | 2 - 357           | 88 - 342  | 10 - 348  |

460

461

462 Nine vascular plant indicators were present in  $\geq$  10 quadrats in the Perthshire population, nine  
 463 in the Lake District and ten in the Cairngorms (Table 3). The mix of indicators recorded  
 464 highlights the difference in microsites occupied by the juniper study populations (Table 3). Of  
 465 42 target indicators, only one, *Vaccinium myrtillus*, was present at all three study populations

466 while quadrat frequency for the remaining indicators varied from 19 – 42 quadrats. Indicators  
467 of drier, moderately fertile soils were only present in the Lake District quadrats, where no  
468 indicators of high soil moisture and three indicators of highly acidic, infertile microsites were  
469 also found. In contrast, there were two indicators of high soil moisture in the Cairngorms, six  
470 for highly acidic, infertile soils (four present in > 40 of 50 quadrats) and no indicators of drier,  
471 moderately fertile microsites (Table 3). Quadrats from Perthshire were dominated (both in  
472 terms of species composition and prevalence across quadrats) by seven taxa indicating  
473 moderate soil moisture (Table 3). However, although only one taxon (*Molinia caerulea*)  
474 indicating high soil moisture was recorded, it was found in 21 of the 51 quadrats, suggesting  
475 widespread, continuous waterlogging across the site.

476

477 **Table 3.** Number of 10 x 10 m quadrats containing vascular plant indicators (where present  
 478 in  $\geq 10$  quadrats). P = Perthshire, LD = Lake District, C = Cairngorms juniper populations.  
 479 Taxa are colour coded according to soil condition categories devised from Ellenberg reaction  
 480 (R), nitrogen (N) and moisture (F) values given in Hill, Preston, & Roy (2004).

| Taxon                         | Soil condition |            | Population |    |    |
|-------------------------------|----------------|------------|------------|----|----|
|                               | R / N          | F          | P          | LD | C  |
| <i>Vaccinium myrtillus</i>    | Yellow         | Light blue | 19         | 27 | 42 |
| <i>Dryopteris affinis</i>     |                | Light blue | 30         | 22 |    |
| <i>Oreopteris limbosperma</i> |                | Light blue | 22         | 10 |    |
| <i>Rubus fruticosus agg.</i>  |                | Light blue | 12         | 12 |    |
| <i>Molinia caerulea</i>       |                | Dark blue  | 21         |    | 15 |
| <i>Juncus conglomeratus</i>   |                | Light blue | 19         | 10 |    |
| <i>Juncus effusus</i>         |                | Light blue | 14         |    | 12 |
| <i>Calluna vulgaris</i>       | Yellow         | Light blue |            | 19 | 46 |
| <i>Betula pendula</i>         |                | Dark blue  |            | 15 | 15 |
| <i>Erica cinerea</i>          | Yellow         | Dark blue  |            | 13 | 12 |
| <i>Dryopteris dilatata</i>    |                | Light blue | 31         |    |    |
| <i>Deschampsia cespitosa</i>  |                | Light blue | 24         |    |    |
| <i>Pteridium aquilinum</i>    |                | Dark blue  |            | 45 |    |
| <i>Ilex aquifolium</i>        |                | Dark blue  |            | 10 |    |
| <i>Vaccinium vitis-idaea</i>  | Yellow         | Dark blue  |            |    | 42 |
| <i>Pinus sylvestris</i>       | Yellow         | Light blue |            |    | 31 |
| <i>Erica tetralix</i>         | Yellow         | Dark blue  |            |    | 13 |

  

|             |                                                              |
|-------------|--------------------------------------------------------------|
| Yellow      | Highly acidic (R = 2),<br>low nitrogen (N = 1-2)             |
| White       | Slightly acidic,<br>moderately fertile<br>(R = 3-5, N = 3-5) |
| Dark blue   | High moisture (F = 8-9)                                      |
| Medium blue | Moderate moisture<br>(F = 6-7)                               |
| Light blue  | Lower moisture (F = 5)                                       |

481

482

### 483 3.2 Abiotic and biotic drivers of spatial variability in disease symptoms of

#### 484 *P. austrocedri*

485

486 The full subset selection modelling resulted in one top model each containing abiotic and biotic  
 487 covariates for the Perthshire and Lake District populations, and two models for the Cairngorms  
 488 population (Table 4). All models included a strong relationship between increasing area of  
 489 *P. austrocedri* symptoms and a measure of increasing soil moisture (Table 5). When the area  
 490 of different vascular plant indicators was added to these models, this resulted in one top model  
 491 with improved fit for each population, with strong, positive relationships between increasing  
 492 symptoms and increasing soil moisture still included but additionally identifying taxa that aid



493 identification of microsites vulnerable to *P. austrocedri* infection in different habitats (Table 4).  
 494 Across all sites, models with abiotic and biotic covariates vastly outperformed the null model  
 495 with no covariates.

496

497 **Table 4.** Model results (DIC, RMSE, dispersion and list of covariates present) for each  
 498 surveyed population, comparing the null model with the top set of models produced before  
 499 and after addition of vascular plant indicators.

| Juniper population | Model              | DIC    | RMSE  | Dispersion | Covariates                                                                                                                                    |
|--------------------|--------------------|--------|-------|------------|-----------------------------------------------------------------------------------------------------------------------------------------------|
| Perthshire         | Without indicators | 167.45 | 43.89 | 0.48       | Juniper density, berry bearing, herbivore damage, soil moisture, watercourse proximity, grazing activity, altitude, slope, soil type, habitat |
|                    | With indicators    | 134.96 | 42.59 | 0.45       | As above with area of <i>Dryopteris dilatata</i>                                                                                              |
|                    | Null               | 301.98 | 37.04 | 0.55       | N/A                                                                                                                                           |
| Lake District      | Without indicators | 264.64 | 32.64 | 0.44       | Juniper density, berry bearing, soil moisture, watercourse proximity, altitude, slope                                                         |
|                    | With indicators    | 208.84 | 22.99 | 0.42       | As above with area of <i>Rubus fruticosus</i> agg.                                                                                            |
|                    | Null               | 301.77 | 41.54 | 0.57       | N/A                                                                                                                                           |
| Cairngorms         | Without indicators | 226.71 | 21.22 | 0.33       | Juniper density, berry bearing, soil moisture, aspect, soil type, habitat                                                                     |
|                    | With indicators    | 225.40 | 21.38 | 0.33       | Juniper density, berry bearing, soil moisture, slope, aspect, soil type, habitat                                                              |
|                    | Null               | 191.92 | 21.09 | 0.30       | As above with area of <i>Erica tetralix</i>                                                                                                   |
|                    | Null               | 293.63 | 43.92 | 0.58       | N/A                                                                                                                                           |

500

501 The Cairngorms population models all predicted the distribution of symptoms with reasonable  
 502 accuracy, as the predicted area of symptoms was within 20 % of observed values (Table 4).  
 503 Addition of a plant indicator improved symptom prediction by 10 % in the Lake District to within  
 504 20 % of the observed values. However, predictive model performance was poorer for the  
 505 Perthshire population where the predicted area of symptomatic juniper was only within 40 %  
 506 of observed values from both the full subsets and plant indicator models (Table 4). No  
 507 evidence of overdispersion was found in the residuals of any of the top models (Table 4), nor  
 508 any consistent, positive, spatial autocorrelation (Appendix D).

509

510 The top model produced for the Perthshire population from the full subset selection included  
511 all ten possible covariates (DIC 167.45) with only one strong relationship identified between  
512 increasing area of symptomatic juniper and increasing soil moisture (Table 5, BCI = 0.70,  
513 4.08). Model fit improved by 32 units (DIC 134.96) when area of *Dryopteris dilatata* was  
514 included: a species of large fern that prefers moist, moderately acidic and fertile soils (Table  
515 3). In this model, the strongest effect (BCI did not bridge zero) was increasing area of  
516 *P. austrocedri* symptoms with increasing area of *D. dilatata* (BCI = 0.70, 4.08). The area of  
517 symptoms also increased very strongly with increasing soil moisture (BCI = -0.04, 1.20) and  
518 decreasing altitude (BCI = -1.72, 0.05), and strongly with decreasing area of herbivore damage  
519 (BCI = -1.41, 0.05).

520

521 Six of the seven potential covariates collected across the Lake District population were  
522 included in the top model prior to adding indicators (DIC 264.64) with area of *P. austrocedri*  
523 symptoms again showing a strong response to soil moisture related covariates, with  
524 symptoms strongly increasing with decreasing distance to watercourses (Table 6, BCI = -0.99,  
525 0.08). Including brambles, *Rubus fruticosus* agg., improved the model fit by 56 DIC units  
526 (Table 4). The BCI for the relationship between increasing area of symptoms and decreasing  
527 distance to watercourses did not bridge zero (BCI = -1.26, -0.14) and the area of symptoms  
528 strongly increased with decreasing area of *R. fruticosus* agg. (BCI = -4.19, 0.09), recorded in  
529 12 of 46 quadrats.

530

531 Two top models were found for the Cairngorms population including six, and seven, of nine  
532 possible covariates; including slope marginally improved model fit (DIC decreased from  
533 226.71 to 225.40). In both models the BCI for soil moisture did not bridge zero, showing a very  
534 strong relationship between increasing area of *P. austrocedri* symptoms with increasing soil  
535 moisture (Table 7). The individual addition of ten indicator taxa to each of these models  
536 resulted in one top model, which contained both slope and cross-leaved heath (*Erica tetralix*).  
537 Model fit was improved by 35 and 33 DIC units compared to the full subset selection models

538 (Table 4). Increasing area of symptoms with increasing area of *E. tetralix* was the only strong  
539 relationship present, for which the BCI did not bridge zero (BCI = 0.26, 1.28). The only indicator  
540 for highly acidic, infertile microsites with high soil moisture is *E. tetralix* recorded in 13 of 50  
541 quadrats (Table 3).

542

543 In addition to soil moisture directly measured within quadrats, top models for all populations  
544 contained positive effects of juniper density and area of juniper bearing berries and negative  
545 effects of slope on symptoms, despite differences in the range of variation sampled across  
546 each population (Table 2). Soil and habitat (NVC community) types only included in the  
547 Perthshire and Cairngorms models were also always present. None of these covariates  
548 showed strong relationships with increasing area of symptoms but removing them resulted in  
549 poorer model fit (i.e. the DIC increased by more than two units).

550

551

552 **Table 5.** Posterior estimates (mean, standard deviation (SD), 2.5 % and 97.5 % quantiles, and % that does  
 553 not bridge zero) for fixed effects included in the top model set for the Perthshire juniper population.

|                                                 | Covariate                  | Mean  | SD    | 2.5%   | 97.5% | % does not bridge zero |
|-------------------------------------------------|----------------------------|-------|-------|--------|-------|------------------------|
| <i>Without indicator species (DIC = 167.45)</i> |                            |       |       |        |       |                        |
|                                                 | Soil moisture              | 0.59  | 0.31  | 0.01   | 1.21  | 100.00                 |
|                                                 | Altitude                   | -0.69 | 0.43  | -1.57  | 0.13  | 92.71                  |
|                                                 | Herbivore damage           | -0.39 | 0.29  | -1.01  | 0.14  | 90.20                  |
|                                                 | Juniper density            | 0.29  | 0.25  | -0.20  | 0.77  | 87.70                  |
|                                                 | Intercept                  | 0.05  | 21.22 | -41.61 | 41.67 | 50.17                  |
|                                                 | Berry bearing              | 0.21  | 0.25  | -0.27  | 0.70  | 80.19                  |
|                                                 | Grazing activity           | -0.17 | 0.26  | -0.67  | 0.34  | 75.21                  |
|                                                 | Watercourse proximity      | -0.03 | 0.31  | -0.66  | 0.55  | 53.17                  |
|                                                 | Slope                      | -0.08 | 0.39  | -0.84  | 0.68  | 57.69                  |
| Habitat                                         | Mosaic                     | -0.70 | 15.82 | -31.76 | 30.32 | 51.17                  |
|                                                 | Mires                      | -0.03 | 15.82 | -31.09 | 31.01 | 50.17                  |
|                                                 | Juniper wood               | 0.80  | 15.83 | -30.28 | 31.86 | 52.17                  |
|                                                 | Acidic grassland           | -0.08 | 15.82 | -31.14 | 30.96 | 50.17                  |
| Soil                                            | Peaty gleys                | 0.22  | 14.15 | -27.57 | 27.99 | 50.17                  |
|                                                 | Organic peaty gleys        | 0.37  | 14.15 | -27.42 | 28.13 | 51.17                  |
|                                                 | Non-calcareous gleys       | -2.65 | 14.19 | -30.52 | 25.19 | 55.18                  |
|                                                 | Brown forest Balrownie     | 0.66  | 14.15 | -27.13 | 28.43 | 51.17                  |
|                                                 | Brown forest Gourdie       | 1.40  | 14.16 | -26.40 | 29.18 | 53.17                  |
| <i>With indicator species (DIC = 134.96)</i>    |                            |       |       |        |       |                        |
|                                                 | <i>Dryopteris dilatata</i> | 2.36  | 0.86  | 0.70   | 4.08  | 100.00                 |
|                                                 | Soil moisture              | 0.57  | 0.32  | -0.04  | 1.20  | 95.21                  |
|                                                 | Altitude                   | -0.81 | 0.45  | -1.72  | 0.05  | 95.19                  |
|                                                 | Herbivore damage           | -0.65 | 0.37  | -1.41  | 0.05  | 95.20                  |
|                                                 | Juniper density            | 0.25  | 0.52  | -0.78  | 1.26  | 67.69                  |
|                                                 | Intercept                  | 0.18  | 21.22 | -41.48 | 41.81 | 50.17                  |
|                                                 | Berry bearing              | 0.06  | 0.26  | -0.45  | 0.57  | 57.68                  |
|                                                 | Grazing activity           | -0.19 | 0.26  | -0.70  | 0.33  | 75.21                  |
|                                                 | Watercourse proximity      | -0.18 | 0.33  | -0.85  | 0.45  | 67.70                  |
|                                                 | Slope                      | 0.07  | 0.41  | -0.73  | 0.87  | 55.18                  |
| Habitat                                         | Mosaic                     | -0.97 | 15.82 | -32.03 | 30.06 | 52.18                  |
|                                                 | Mires                      | -0.18 | 15.82 | -31.24 | 30.86 | 50.17                  |
|                                                 | Juniper wood               | 1.45  | 15.84 | -29.65 | 32.52 | 53.17                  |
|                                                 | Acidic grassland           | -0.30 | 15.82 | -31.37 | 30.73 | 50.17                  |
| Soil                                            | Peaty gleys                | -0.14 | 14.15 | -27.93 | 27.63 | 50.17                  |
|                                                 | Organic peaty gleys        | 0.50  | 14.15 | -27.29 | 28.26 | 51.17                  |
|                                                 | Non-calcareous gleys       | -3.05 | 14.19 | -30.91 | 24.80 | 57.68                  |
|                                                 | Brown forest Balrownie     | 1.06  | 14.16 | -26.73 | 28.83 | 52.67                  |
|                                                 | Brown forest Gourdie       | 1.62  | 14.16 | -26.18 | 29.41 | 54.17                  |

554

555

556 **Table 6.** Posterior estimates (mean, standard deviation (SD), 2.5 % and 97.5 % quantiles, and % that does  
 557 not bridge zero) for fixed effects included in the top model set for the Lake District juniper population.

| Covariate                                       | Mean  | SD   | 2.5%  | 97.5% | % does not bridge zero |
|-------------------------------------------------|-------|------|-------|-------|------------------------|
| <i>Without indicator species (DIC = 264.64)</i> |       |      |       |       |                        |
| Intercept                                       | -1.28 | 0.45 | -2.19 | -0.43 | 100.00                 |
| Watercourse proximity                           | -0.41 | 0.27 | -0.99 | 0.09  | 92.70                  |
| Soil moisture                                   | 0.09  | 0.25 | -0.41 | 0.58  | 62.69                  |
| Juniper density                                 | 0.17  | 0.50 | -0.78 | 1.17  | 62.67                  |
| Berry bearing                                   | 0.00  | 0.22 | -0.45 | 0.41  | 52.18                  |
| Altitude                                        | 0.22  | 0.24 | -0.24 | 0.70  | 80.19                  |
| Slope                                           | -0.26 | 0.28 | -0.83 | 0.29  | 80.20                  |
| <i>With indicator species (DIC = 208.84)</i>    |       |      |       |       |                        |
| Intercept                                       | -1.29 | 0.43 | -2.16 | -0.47 | 100.00                 |
| Watercourse proximity                           | -0.66 | 0.29 | -1.26 | -0.14 | 100.00                 |
| <i>Rubus fruticosus agg.</i>                    | -1.81 | 1.09 | -4.19 | 0.09  | 95.23                  |
| Soil moisture                                   | 0.00  | 0.25 | -0.51 | 0.48  | 50.17                  |
| Juniper density                                 | -0.21 | 0.55 | -1.27 | 0.88  | 65.19                  |
| Berry bearing                                   | -0.04 | 0.22 | -0.49 | 0.36  | 55.18                  |
| Altitude                                        | -0.24 | 0.30 | -0.82 | 0.35  | 77.68                  |
| Slope                                           | 0.06  | 0.29 | -0.53 | 0.62  | 57.70                  |

558

559 **Table 7.** Posterior estimates (mean, standard deviation (SD), 2.5 % and 97.5 % quantiles, and % that does  
 560 not bridge zero) for fixed effects included in the top model set for the Cairngorms juniper population.

|                                                 | Covariate                        | Mean  | SD    | 2.5%   | 97.5% | % does not bridge zero |
|-------------------------------------------------|----------------------------------|-------|-------|--------|-------|------------------------|
| <i>Without indicator species (DIC = 226.71)</i> |                                  |       |       |        |       |                        |
|                                                 | Soil moisture                    | 0.54  | 0.22  | 0.09   | 0.98  | 100.00                 |
|                                                 | Berry bearing                    | 0.18  | 0.18  | -0.18  | 0.53  | 82.68                  |
|                                                 | Intercept                        | -1.15 | 27.39 | -54.93 | 52.58 | 51.17                  |
|                                                 | Juniper density                  | -0.18 | 0.44  | -1.01  | 0.70  | 65.20                  |
|                                                 | Aspect                           | -0.02 | 0.21  | -0.45  | 0.39  | 54.17                  |
| Habitat                                         | Scots pine woodland              | 0.64  | 15.82 | -30.43 | 31.67 | 51.17                  |
|                                                 | Heath                            | 0.19  | 15.82 | -30.86 | 31.22 | 50.17                  |
|                                                 | Coniferous plantation            | -0.73 | 15.84 | -31.83 | 30.34 | 51.17                  |
|                                                 | Acidic grassland                 | -0.09 | 15.82 | -31.16 | 30.95 | 50.17                  |
| Soil                                            | Humus-iron podzols; gleys        | 0.46  | 22.36 | -43.44 | 44.33 | 50.17                  |
|                                                 | Humus-iron podzols; brown forest | -0.46 | 22.36 | -44.37 | 43.40 | 50.17                  |
| <i>Without indicator species (DIC = 225.40)</i> |                                  |       |       |        |       |                        |
|                                                 | Soil moisture                    | 0.57  | 0.23  | 0.12   | 1.01  | 100.00                 |
|                                                 | Berry bearing                    | 0.17  | 0.18  | -0.18  | 0.52  | 82.68                  |
|                                                 | Intercept                        | -1.08 | 27.39 | -54.85 | 52.66 | 51.17                  |
|                                                 | Juniper density                  | -0.24 | 0.44  | -1.09  | 0.65  | 70.19                  |
|                                                 | Slope                            | 0.13  | 0.22  | -0.31  | 0.54  | 72.69                  |
|                                                 | Aspect                           | -0.07 | 0.23  | -0.52  | 0.37  | 60.17                  |
| Habitat                                         | Scots pine woodland              | 0.67  | 15.82 | -30.39 | 31.71 | 51.17                  |
|                                                 | Heath                            | 0.17  | 15.82 | -30.88 | 31.20 | 50.17                  |
|                                                 | Coniferous plantation            | -0.76 | 15.84 | -31.86 | 30.31 | 51.17                  |
|                                                 | Acidic grassland                 | -0.07 | 15.82 | -31.14 | 30.97 | 50.17                  |
| Soil                                            | Humus-iron podzols; gleys        | 0.52  | 22.36 | -43.39 | 44.38 | 50.17                  |
|                                                 | Humus-iron podzols; brown forest | -0.52 | 22.36 | -44.42 | 43.35 | 50.17                  |
| <i>With indicator species (DIC = 191.92)</i>    |                                  |       |       |        |       |                        |
|                                                 | <i>Erica tetralix</i>            | 0.73  | 0.26  | 0.26   | 1.28  | 100.00                 |
|                                                 | Soil moisture                    | 0.19  | 0.27  | -0.36  | 0.71  | 75.21                  |
|                                                 | Berry bearing                    | 0.15  | 0.18  | -0.22  | 0.50  | 77.72                  |
|                                                 | Intercept                        | -1.72 | 27.39 | -55.50 | 52.02 | 52.18                  |
|                                                 | Juniper density                  | -0.02 | 0.46  | -0.88  | 0.91  | 52.68                  |
|                                                 | Slope                            | 0.04  | 0.21  | -0.39  | 0.45  | 57.70                  |
|                                                 | Aspect                           | 0.05  | 0.23  | -0.42  | 0.50  | 57.69                  |
| Habitat                                         | Scots pine woodland              | 1.12  | 15.82 | -29.95 | 32.16 | 52.67                  |
|                                                 | Heath                            | 0.47  | 15.82 | -30.59 | 31.50 | 51.17                  |
|                                                 | Coniferous plantation            | -2.26 | 15.85 | -33.39 | 28.84 | 55.18                  |
|                                                 | Acidic grassland                 | 0.69  | 15.83 | -30.39 | 31.73 | 51.17                  |
| Soil                                            | Humus-iron podzols; gleys        | 0.30  | 22.36 | -43.60 | 44.17 | 50.17                  |
|                                                 | Humus-iron podzols; brown forest | -0.30 | 22.36 | -44.21 | 43.56 | 50.17                  |

## 562 4.0 Discussion

563

564 Our study provides the first evidence from the northern hemisphere that, out of the wide range  
565 of potential abiotic and biotic drivers considered, and despite differences in the range of  
566 conditions, geographic location and infection intensity occupied by study populations, soil  
567 moisture is the best predictor of *P. austrocedri* symptom distribution in juniper at population  
568 scale. This is likely to result from the pathogen's dependence on soil moisture for zoospore  
569 dispersal (Green et al., 2015; Greslebin et al., 2007).

570

571 Introductions of non-native *Phytophthora* taxa have been reported from 176 countries across  
572 a wide range of climatic zones (Barwell et al., in review). Water availability is commonly  
573 identified as an important driver of terrestrial *Phytophthora* distributions at a range of scales.  
574 Globally, functional and species diversity increases with precipitation (Redondo et al., 2018).  
575 Landscape scale examples include increased incidence of *P. lateralis* in Port Orford cedar  
576 with increasing creek drainage area (Jules et al., 2008), and increased *P. ramorum* infection  
577 of tanoak with increasing stream proximity (Peterson et al., 2014). In individual trees, the  
578 length of *P. cinnamomi* lesions increase in Jarrah with increasing precipitation (Bunny et al.,  
579 1995) because water is required to stimulate sporangial formation, trigger zoospore release  
580 and enable dispersal (Hardham, 2005).

581

582 The importance of soil moisture as a driver of *P. austrocedri* infection in juniper populations is  
583 likely to vary between sites with different soil types and hydrology. Area of symptoms  
584 increased very strongly with point sampled soil moisture in both the Cairngorms and  
585 Perthshire populations, which grow on deep soils formed from glacial till, with pockets of  
586 gleying, that retain a high volume of soil moisture throughout the year. This is consistent with  
587 population level studies of Chilean cedar where *P. austrocedri* infection increases with soil  
588 waterlogging caused by high clay content (La Manna and Rajchenberg, 2004a) or features  
589 restricting water permeability (La Manna & Rajchenberg, 2004b).

590

591 Though microsite soil moisture is partly a function of soil type, explicitly including soil type in  
592 the Cairngorms and Perthshire models always improved model performance but never  
593 strongly predicted the area of symptoms, probably because the available data for soil type  
594 were too coarse in spatial resolution (250 m) to capture microsite variation.

595

596 Spatial variation in area of symptoms was also linked to soil moisture in the Lake District  
597 populations but here the strongest association was between symptoms and decreasing  
598 proximity to watercourses rather than point sampled soil moisture. Given the steep site  
599 topography and freely draining, shallow, sandy soil type, it is likely that juniper in this  
600 population is only exposed to long term waterlogging where it grows adjacent to watercourses.  
601 Stands of Chilean cedar growing in comparable (freely draining, volcanic) soils also  
602 demonstrate increased infection with increasing proximity to watercourses (Calí, 1996; La  
603 Manna & Rajchenberg, 2004a).

604

605 A key challenge for investigating field scale drivers of disease is obtaining data at a suitably  
606 detailed spatial resolution. Modelling microsite soil moisture patterns was prohibited by the  
607 availability of fine scale data on hydrological processes (such as precipitation, potential  
608 evaporation and runoff generation). Topographic wetness index (TWI), calculated from site  
609 topography and watercourse networks, is commonly used as a proxy for soil moisture. In the  
610 absence of variability in slope and altitude gradients, the calculation tends to overpredict  
611 differences (Grabs et al., 2009) and did not yield an informative distribution map for the  
612 Cairngorms juniper population (results not shown). It also assumes uniform soil properties and  
613 does not account for complex bedrock surfaces, invalidating the data derived for the Lake  
614 District population (results not shown) (Kopecký and Čížková, 2010). Measuring soil moisture  
615 directly from stratified quadrats as % volumetric water content captured variation in water table  
616 heights but only represents conditions at a single point in time and differences between  
617 microsites may be exaggerated by rainfall events that occurred during the sampling period.



618

619 We introduced the area of vascular plant indicators, selected to represent a range of soil  
620 moisture preferences, to test whether such indicators capture longer term water table levels  
621 than short term soil moisture field observations, or other fine scale soil attributes affecting  
622 transmission and disease such as pH and nitrogen content. This was successful in the  
623 Cairngorms, where adding area of cross-leaved heath, *Erica tetralix*, resulted in a very strong,  
624 positive, relationship with increasing area of symptoms ( $\Delta$  DIC = 33), corroborating the  
625 response with increasing soil moisture as cross-leaved heath grows in constantly wet but not  
626 inundated soils (Hill et al., 2004). These findings suggest microsites most vulnerable to  
627 *P. austrocedri* infection could be identified using indicator species with distinctive soil moisture  
628 preferences.

629

630 Uncoupling relationships between vegetative cover and soil moisture from other factors such  
631 as interspecific competition and land management practices proved difficult for the remaining  
632 populations. The best Perthshire model was obtained by adding area of broad-buckler fern,  
633 *Dryopteris dilatata*, which increased with increasing area of symptoms ( $\Delta$  DIC = 32, BCI did  
634 not bridge zero). This correlation is more likely to result from the fern preferentially colonising  
635 dead juniper following *P. austrocedri* induced mortality than suggest a higher percentage of  
636 symptoms occurred in the drier soil conditions favoured by the fern (Table 3) (Hill et al., 2004;  
637 Rünk et al., 2012).

638

639 Adding area of brambles (*Rubus fruticosus* agg.) yielded the greatest improvement in Lake  
640 District model performance ( $\Delta$  DIC = 56) and showed a strong (BCI 0.90 – 0.94), negative  
641 relationship with area of symptoms. While four other short-listed taxa for the Lake District also  
642 indicate moderate soil moisture conditions, only brambles indicate neutral, moderately fertile  
643 soils (Hill et al., 2004). When considered alongside the relationship found in the Cairngorms  
644 model between increased symptoms and area of cross-leaved heath, itself an indicator of  
645 highly acidic soils (pH 1-3) (Hill et al., 2004), and increasing infection of Chilean cedar in soils

646 containing low levels of alkaline sodium fluoride (NaF) (La Manna et al., 2012) this might  
647 suggest *P. austrocedri* occurs more frequently in acidic soils.

648

649 However, brambles are also highly unpalatable to herbivores, which preferentially avoid eating  
650 them (Bee et al., 2009). Thus increasing symptoms in the absence of brambles might point to  
651 herbivore mediated dispersal of inoculum. A cost distance analysis comparing three cattle  
652 grazing scenarios (no grazing, roaming with intermittent barriers such as steep slopes and  
653 free roaming) found total area and dispersion of *P. austrocedri* was higher in Chilean cedar  
654 forests with unrestricted grazing (La Manna et al., 2013). Similarly, infection of Port Orford  
655 cedar with *P. lateralis* increases along wildlife (including bear) trails that “fill-in” uninfected sites  
656 following disease establishment around creek edges (Jules et al., 2008).

657

658 Although our results cannot distinguish between the effects of pH and passive movement of  
659 inoculum on herbivore hooves, they do clearly indicate that direct herbivore damage does not  
660 increase infection. Herbivore damage was absent from the Cairngorms and Lake District  
661 models and though present in Perthshire, symptoms decreased with increasing herbivory (BCI  
662 0.90 – 0.94).

663

664 Slope was present in all top models, describing some of the residual variance as a weak,  
665 negative relationship with area of symptoms, even in the limited range occupied by the  
666 Cairngorms population (Table 2). Positive relationships with area of berry-bearing juniper were  
667 also present in all top models and the weak response could indicate female juniper without  
668 berries were missed by the survey. Similarly, juniper density was present in all top models  
669 showing a weakly positive relationship with symptoms. The intensity of field scale infections  
670 of Chilean cedar with *P. austrocedri*, and white oak (*Quercus alba*) with the similarly soil-borne  
671 *P. cinnamomi*, were found to increase with increasing host density, suggesting our  
672 characterisation of juniper density as  $\pm 20$  % cover in 30 x 30 m was too simplistic. This

673 highlights the need for further exploration of the role of host connectivity in facilitating *P.*  
674 *austrorcedri* spread in future research across a range of different spatial scales.

675

676 Models produced for Perthshire had the lowest accuracy (RMSE 42.59) despite containing the  
677 largest number of covariates (11) meaning those included poorly account for the spatial  
678 distribution of symptoms. The watercourses mapped for Perthshire include herringbone  
679 drainage channels opened in 2011 (Taylor, H., 2019, pers. comm. 1 Nov) after juniper stands  
680 started to decline in the late 1990's (Broome et al., 2008) but before isolation of *P. austrorcedri*  
681 in 2012 (Green et al., 2015). The drainage work may have inadvertently distributed the  
682 pathogen across the site by disturbing watercourses and moving contaminated soil in tyre  
683 treads. It is unclear if the very strong increase in area of symptoms with decreasing altitude  
684 (BCI > 0.95) reflects the location where the pathogen was first introduced or the drainage  
685 activity that was concentrated between 220 – 250 m of the 180 – 310 m altitudinal range (Fig.  
686 3, Table 2) causing the pathogen to spread further and faster than dispersal through soil  
687 moisture alone. This highlights the importance of capturing and integrating the spatial  
688 arrangement and intensity of management actions into investigations of drivers of site level  
689 variation in plant disease impacts (Fernández-habas et al., 2019).

690

## 691 **5.0 Conclusion**

692

693 Our study provides valuable insights about how conditions favouring newly invading plant  
694 diseases can be delineated by collecting and modelling spatially explicit data at field scale.  
695 Directly measuring covariates in the field in sites of different disease status, across key  
696 environmental gradients using a carefully designed sampling strategy, enabled us to explore  
697 a wide range of potential drivers, identify those with the most explanatory power and make  
698 comparisons between populations occupying different ranges along each gradient. In addition,  
699 our findings can be used by practitioners to target management interventions that match the  
700 inherent scale of pathogen spread.

701

702 Interventions to manage juniper populations at local level such as drainage, grazing  
703 exclosures and seedling propagation require significant resources (Forestry Commission  
704 Scotland, 2006). The introduction of *P. austrocedri* to the UK risks this investment and the  
705 longevity of these actions if measures to prevent disease introduction and establishment are  
706 not undertaken.

707

708 Our results suggest *P. austrocedri* is most likely to infect juniper where it occupies wet  
709 microsites - in the UK and across its global range. Surveys by plant health inspectors to detect  
710 *P. austrocedri* should be prioritised for populations and stands occupying consistently wet  
711 microsites, identification of which could be aided by plant species indicators. While improved  
712 biosecurity measures, such as cleaning all machinery, equipment and footwear before and  
713 after accessing juniper sites (irrespective of known disease status), will reduce the risk of  
714 pathogen introduction and spread (Department for Environment Food & Rural Affairs, 2014b),  
715 our results suggest activities that disturb watercourses or wet soils (such as drainage and  
716 infrastructure installation) pose the highest risk of collecting and transporting *P. austrocedri*  
717 oospores and zoospores.

718

719 Our findings further support recommendations published by the UK Department for  
720 Environment, Food and Rural Affairs in the Juniper Management Guidelines to divert footpaths  
721 away from waterlogged areas and only plant juniper in drier microsites, giving full  
722 consideration to the vulnerability of existing populations, suspected disease status, soil type  
723 and the watercourse network (Department for Environment Food & Rural Affairs, 2017).  
724 Continued emphasis on improving the quality and extent of populations in drier soil conditions  
725 by regulating grazing levels, curtailing stand removal and creating spaces for natural  
726 regeneration (Broome et al., 2017; Wilkins and Duckworth, 2011) will help maximise resilience  
727 of native juniper populations to this new disease threat.

728

729 Acknowledgements

730 The authors wish to thank Rothiemurchus Estate, Dalemain Estate, Drummond Estate, the  
731 Steeles, and the Taylforth for permitting us to survey juniper populations they manage;  
732 Carolyn Riddell for assistance with qPCR analysis, as well as lesion sampling alongside April  
733 Armstrong and Ewan Purser; France Gerard and John Redhead for advice on aerial image  
734 classification methods; Hollie Cooper, Morag McCracken and Pete Scarlett for preparing and  
735 lending survey equipment; and finally to Fiona Cameron, Deborah Comyn-Platt, Etienne  
736 Duperron, Rory Hodd, Susan Medcalf, Denise Pallett, Mari Roberts and Rosamund Sparks  
737 for their excellent assistance collecting field data. F. Donald was funded by the Scottish  
738 Forestry Trust, Scottish Forestry, Forest Research, Scottish Natural Heritage and the Royal  
739 Botanic Garden Edinburgh.

740

741 Appendix A. Mapping juniper study populations

742 Appendix B. Associate species target list

743 Appendix C. Distribution of *P. austrocedri* qPCR results

744 Appendix D. Additional information for model selection

745 **References**

- 746 Anderson, R.M., May, R.M., 1986. The invasion, persistence and spread of infectious  
747 diseases within animal and plant communities. *Philos. Trans. R. Soc. Lond. B. Biol. Sci.*  
748 314, 533–570. <https://doi.org/10.1098/rstb.1986.0072>
- 749 Baccalá, N.B., Rosso, P.H., Havrylenko, M., 1998. *Austrocedrus chilensis* mortality in the  
750 Nahuel Huapi National Park (Argentina). *For. Ecol. Manage.* 109, 261–269.  
751 [https://doi.org/10.1016/S0378-1127\(98\)00250-3](https://doi.org/10.1016/S0378-1127(98)00250-3)
- 752 Barwell, L.J, Perez-Sierra, A., Henricot, B., Harris, A., Burgess, T.I., Hardy, G., Scott, P.,  
753 Williams, N., Cooke, D., Green, S., Chapman, D.S., Purse, B.V. (in review). Trait-based  
754 approaches for predicting future global impacts of pathogens in the genus  
755 *Phytophthora*.
- 756 Bee, J.N., Tanentzap, A.J., Lee, W.G., Lavers, R.B., Mark, A.F., Mills, J.A., Coomes, D.A.,  
757 2009. The benefits of being in a bad neighbourhood: plant community composition  
758 influences red deer foraging decisions. *Oikos* 118, 18–24.  
759 <https://doi.org/10.1111/j.1600-0706.2008.16756.x>
- 760 Bjornstad, O.N., 2019. ncf: Spatial Covariance Functions. R package version 1.2-8.  
761 <https://CRAN.R-project.org/package=ncf>
- 762 Botanical Society of Britain and Ireland, 2017. *Juniperus communis* records from live  
763 database [WWW Document]. URL <http://bsbi.org/maps?taxonid=2cd4p9h.8r1>  
764 (accessed 5.12.17).
- 765 Boyd, I.L., Freer-Smith, P.H., Gilligan, C.A., Godfray, H.C.J., 2013. The consequence of tree  
766 pests and diseases for ecosystem services. *Science* 342, 823-833.  
767 <https://doi.org/10.1126/science.1235773>
- 768 Broome, A., Holl, K., 2017. Can the site conditions required for successful natural  
769 regeneration of juniper (*Juniperus communis* L.) be determined from a single species  
770 survey? *Plant Ecol. Divers.* 00, 1–10. <https://doi.org/10.1080/17550874.2017.1336186>
- 771 Broome, A., Long, D., Ward, L.K., Park, K.J., 2017. Promoting natural regeneration for the  
772 restoration of *Juniperus communis*: a synthesis of knowledge and evidence for

- 773 conservation practitioners. *Appl. Veg. Sci.* 1–13. <https://doi.org/10.1111/avsc.12303>
- 774 Broome, A, Hendry, S., Smith, M., Rayner, W., Nichol, B., Perks, M., Connolly, T., Tene, A.,  
775 Bochereau, F., 2008. Investigation of the possible causes of dieback of Glenartney  
776 Juniper Wood SAC Perthshire. Project No: 18895. Report commissioned by Scottish  
777 Natural Heritage. Forest Research. Roslin.
- 778 Bunny, F.J.; Crombie, D.S.; Williams, M.R., 1995. Growth of lesions of *Phytophthora*  
779 *cinnamomi* in stems and roots of jarrah (*Eucalyptus marginata*) in relation to rainfall and  
780 stand density in mediterranean forest of Western Australia. *Can. J. For. Res.* 25, 961–  
781 969.
- 782 Call´, S.G., 1996. *Austrocedrus chilensis*: estudio de los anillos de crecimiento y su relacio´n  
783 con la dina´mica del “Mal del Ciprés” en el P.N. Nahuel Huapi, Argentina. Universidad  
784 Nacional del Comahue.
- 785 Chapman, D., Purse, B.V., Roy, H.E., 2017. Global trade networks determine the distribution  
786 of invasive non-native species. *Glob. Ecol. Biogeogr.* 1–11. <https://doi.org/10.1002/elan>.
- 787 Chapman, D.S., Makra, L., Albertini, R., Bonini, M., Páldy, A., Rodinkova, V., Šikoparija, B.,  
788 Weryszko-Chmielewska, E., Bullock, J.M., 2016. Modelling the introduction and spread  
789 of non-native species: international trade and climate change drive ragweed invasion.  
790 *Glob. Chang. Biol.* 22, 3067–3079. <https://doi.org/10.1111/gcb.13220>
- 791 Clifton, S.J., Ward, L.K., Ranner, D.S., 1997. The status of juniper - *Juniperus communis* L. -  
792 in North-East England. *Biol. Conserv.* 79.
- 793 Cunniffe, N.J., Cobb, R.C., Meentemeyer, R.K., Rizzo, D.M., Gilligan, C.A., 2016. Modeling  
794 when, where, and how to manage a forest epidemic, motivated by sudden oak death in  
795 California. *Proc. Natl. Acad. Sci.* 113, 5640–5645.  
796 <https://doi.org/10.1073/pnas.1602153113>
- 797 Department for Environment Food & Rural Affairs, 2017. Juniper management guidelines.  
798 [https://www.planthealthcentre.scot/sites/www.planthealthcentre.scot/files/inline-](https://www.planthealthcentre.scot/sites/www.planthealthcentre.scot/files/inline-files/JuniperManagementGuidelinesSeptember2017Published.pdf)  
799 [files/JuniperManagementGuidelinesSeptember2017Published.pdf](https://www.planthealthcentre.scot/sites/www.planthealthcentre.scot/files/inline-files/JuniperManagementGuidelinesSeptember2017Published.pdf)
- 800 Department for Environment Food & Rural Affairs, 2014a. Tree Health Management Plan.

- 801 <https://assets.publishing.service.gov.uk/government/uploads/system/uploads/attachme>  
802 [nt\\_data/file/307299/pb14167-tree-health-management-plan.pdf](https://assets.publishing.service.gov.uk/government/uploads/system/uploads/attachme)
- 803 Department for Environment Food & Rural Affairs, 2014b. Protecting Plant Health. A Plant  
804 Biosecurity Strategy for Great Britain.
- 805 <https://assets.publishing.service.gov.uk/government/uploads/system/uploads/attachme>  
806 [nt\\_data/file/307355/pb14168-plant-health-strategy.pdf](https://assets.publishing.service.gov.uk/government/uploads/system/uploads/attachme)
- 807 Dillon, W.W., Haas, S.E., Rizzo, D.M., Meentemeyer, R.K., 2014. Perspectives of spatial  
808 scale in a wildland forest epidemic. *Eur. J. Plant Pathol.* 138, 449–465.
- 809 <https://doi.org/10.1007/s10658-013-0376-3>
- 810 El Mujtar, V.A., Perdomo, M.H., Gallo, L.A., Grau, O., 2012. Susceptibilidad diferencial al  
811 mal del ciprés entre sexos de *Austrocedrus chilensis* en la patagonia (Argentina).  
812 *Bosque* 33, 221–226. <https://doi.org/10.4067/S0717-92002012000200012>
- 813 [dataset] Farewell, T.S., Truckell, I.G., Keay, C.A., Hallett, S., 2011. Use and applications of  
814 the Soilscales datasets.
- 815 [http://www.landis.org.uk/downloads/downloads/Soilscales\\_Brochure.pdf](http://www.landis.org.uk/downloads/downloads/Soilscales_Brochure.pdf)
- 816 Fernández-Habas, J., Fernández-Rebollo, P., Rivas Casado, M., García Moreno, A.M.,  
817 Abellanas, B., 2019. Spatio-temporal analysis of oak decline process in open  
818 woodlands: a case study in SW Spain. *J. Environ. Manage.* 248, 109308.
- 819 <https://doi.org/10.1016/j.jenvman.2019.109308>
- 820 Forbes, A.R.D., 1984. Glen Artney Juniper Wood: An ecological study. Honours thesis  
821 (unpubl.). Stirling University, Stirling.
- 822 Forestry Commission Scotland, 2006. Support for juniper conservation under the Scottish  
823 Rural Development Programme (SRDP).
- 824 <https://scotland.forestry.gov.uk/images/corporate/pdf/junipersrdptechnicalnote.pdf>
- 825 Gelman, A., Hill, J., 2006. Data analysis using regression and multilevel/hierarchical models.  
826 Cambridge University Press.
- 827 Gilligan, C.A., Van Den Bosch, F., 2008. Epidemiological models for invasion and  
828 persistence of pathogens. *Annu. Rev. Phytopathol* 46, 385–418.



- 829 <https://doi.org/10.1146/annurev.phyto.45.062806.094357>
- 830 Grabs, T., Seibert, J., Bishop, K., Laudon, H., 2009. Modeling spatial patterns of saturated  
831 areas: a comparison of the topographic wetness index and a dynamic distributed  
832 model. *J. Hydrol.* 373, 15–23. <https://doi.org/10.1016/j.jhydrol.2009.03.031>
- 833 Green, S., Elliot, M., Armstrong, A., Hendry, S.J., 2015. *Phytophthora austrocedrae* emerges  
834 as a serious threat to juniper (*Juniperus communis*) in Britain. *Plant Pathol.* 64, 456–  
835 466. <https://doi.org/10.1111/ppa.12253>
- 836 Green, S., Hendry, S.J., Macaskill, G.A., Laue, B.E., Steele, H., 2012. Dieback and mortality  
837 of *Juniperus communis* in Britain associated with *Phytophthora austrocedrae*. *New*  
838 *Disease Reports* 26, 2. <https://doi.org/10.5197/j.2044-0588.2012.026.002>
- 839 Greslebin, A.G., Hansen, E.M., 2010. Pathogenicity of *Phytophthora austrocedrae* on  
840 *Austrocedrus chilensis* and its relationship with mal del ciprés in Patagonia. *Plant*  
841 *Pathol.* 59, 604–612. <https://doi.org/10.1111/j.1365-3059.2010.02258.x>
- 842 Greslebin, A.G., Hansen, E.M., Sutton, W., 2007. *Phytophthora austrocedrae* sp. nov., a  
843 new species associated with *Austrocedrus chilensis* mortality in Patagonia (Argentina).  
844 *Mycol. Res.* 111, 308–316. <https://doi.org/10.1016/j.mycres.2007.01.008>
- 845 Hansen, E.M., 2015. *Phytophthora* species emerging as pathogens of forest trees. *Curr. For.*  
846 *Reports* 1, 16–24. <https://doi.org/10.1007/s40725-015-0007-7>
- 847 Hardham, A.R., 2005. *Phytophthora cinnamomi*. *Mol. Plant Pathol.* 6, 589–604.  
848 <https://doi.org/10.1111/j.1364-3703.2005.00308.x>
- 849 Henricot, B., Pérez-Sierra, A., Armstrong, A.C., Sharp, P.M., Green, S., 2017. Morphological  
850 and genetic analyses of the invasive forest pathogen *Phytophthora austrocedri* reveal  
851 that two clonal lineages colonized Britain and Argentina from a common ancestral  
852 population. *Phytopathology* 107, 1532–1540.  
853 <https://doi.org/10.1094/PHTO-03-17-0126-R>
- 854 Hijmans, R.J., 2016. raster: Geographic Data Analysis and Modeling. R package version  
855 3.0-2. <https://CRAN.R-project.org/package=raster>
- 856 Hill, M.O., Preston, C.D., Roy, D.B., 2004. PLANTATT Attributes of British and Irish plants:

- 857 status, size, life history, geography and habitats. NERC Centre for Ecology and  
858 Hydrology, Cambridge.
- 859 Hughes, G., Madden, L.V., 1993. Using the beta-binomial distribution to describe  
860 aggregated patterns of disease incidence. *Ecol. Epidemiol.* 83, 759–763.
- 861 [dataset] James Hutton Institute, 2011. 1:250,000 Soil map (National soil map of Scotland).  
862 [https://www.hutton.ac.uk/learning/natural-resource-datasets/soilshutton/soils-maps-](https://www.hutton.ac.uk/learning/natural-resource-datasets/soilshutton/soils-maps-scotland/download#soilmapdata)  
863 [scotland/download#soilmapdata](https://www.hutton.ac.uk/learning/natural-resource-datasets/soilshutton/soils-maps-scotland/download#soilmapdata)
- 864 Jules, E.S., Kauffman, M.J., Ritts, W.D., Carroll, A.L., 2008. Spread of an invasive pathogen  
865 over a variable landscape: a non-native root rot on Port Orford cedar. *Ecol. Soc. of*  
866 *America* 83, 3167–3181.  
867 [https://doi.org/10.1890/00129658\(2002\)083\[3167:SOAIPO\]2.0.CO;2](https://doi.org/10.1890/00129658(2002)083[3167:SOAIPO]2.0.CO;2)
- 868 Kopecký, M., Čížková, Š., 2010. Using topographic wetness index in vegetation ecology:  
869 does the algorithm matter? *Appl. Veg. Sci.* 13, 450–459.  
870 <https://doi.org/10.1111/j.1654-109X.2010.01083.x>
- 871 Kovacs, K., Václavík, T., Haight, R.G., Pang, A., Cunniffe, N.J., Gilligan, C.A., Meentemeyer,  
872 R.K., 2011. Predicting the economic costs and property value losses attributed to  
873 sudden oak death damage in California (2010–2020). *J. Environ. Manage.* 92, 1292–  
874 1302. <https://doi.org/10.1016/j.jenvman.2010.12.018>
- 875 La Manna, L., Greslebin, A.G., Matteucci, S.D., 2013. Applying cost-distance analysis for  
876 forest disease risk mapping: *Phytophthora austrocedrae* as an example. *Eur. J. For.*  
877 *Res.* 132, 877–885. <https://doi.org/10.1007/s10342-013-0720-3>
- 878 La Manna, L., Matteucci, S.D., 2012. Spatial and temporal patterns at small scale in  
879 *Austrocedrus chilensis* diseased forests and their effect on disease progression. *Eur. J.*  
880 *For. Res.* 131, 1487–1499. <https://doi.org/10.1007/s10342-012-0617-6>
- 881 La Manna, L., Matteucci, S.D., Kitzberger, T., 2012. Modelling *Phytophthora* disease risk in  
882 *Austrocedrus chilensis* forests of Patagonia. *Eur. J. For. Res.* 131, 323–337.  
883 <https://doi.org/10.1007/s10342-011-0503-7>
- 884 La Manna, L., Matteucci, S.D., Kitzberger, T., 2008. Abiotic factors related to the incidence

- 885 of the *Austrocedrus chilensis* disease syndrome at a landscape scale. For. Ecol.  
886 Manage. 256, 1087–1095. <https://doi.org/10.1016/j.foreco.2008.06.023>
- 887 La Manna, L., Rajchenberg, M., 2004a. Soil properties and *Austrocedrus chilensis* forest  
888 decline in Central Patagonia, Argentina. Plant Soil 263, 29–41.  
889 <https://doi.org/10.1023/B:PLSO.0000047723.86797.13>
- 890 La Manna, L., Rajchenberg, M., 2004b. The decline of *Austrocedrus chilensis* forests in  
891 Patagonia, Argentina: soil features as predisposing factors. For. Ecol. Manage. 190,  
892 345–357. <https://doi.org/10.1016/j.foreco.2003.10.025>
- 893 Long, D., Williams, J., 2007. Juniper in the British uplands: the Plantlife juniper survey  
894 results. Stirling.
- 895 Meentemeyer, R.K., Cunniffe, N.J., Cook, A.R., Filipe, J.A.N., Hunter, R.D., Rizzo, D.M.,  
896 Gilligan, C.A., 2011. Epidemiological modeling of invasion in heterogeneous  
897 landscapes: spread of sudden oak death in California (1990–2030). Ecosphere.  
898 <https://doi.org/10.1890/ES10-00192.1>
- 899 Mills, P., Dehnen-Schmutz, K., Ilbery, B., Jeger, M., Jones, G., Little, R., MacLeod, A.,  
900 Parker, S., Pautasso, M., Pietravalle, S., Maye, D., 2011. Integrating natural and social  
901 science perspectives on plant disease risk, management and policy formulation. Philos.  
902 Trans. R. Soc. B Biol. Sci. 366, 2035–2044. <https://doi.org/10.1098/rstb.2010.0411>
- 903 [dataset] Moore, R.V., Morris, D.G., Flavin, R.W., 2000. CEH digital river network of Great  
904 Britain (1:50,000).  
905 <https://catalogue.ceh.ac.uk/documents/7d5e42b6-7729-46c8-99e9-f9e4efddde1d>
- 906 Mulholland, V., Schlenzig, A., Macaskill, G.A., Green, S., 2013. Development of a  
907 quantitative real-time PCR assay for the detection of *Phytophthora austrocedrae*, an  
908 emerging pathogen in Britain. For. Pathol. 43, 513–517.  
909 <https://doi.org/10.1111/efp.12058>
- 910 Nagle, A.M., Long, R.P., Madden, L. V., Bonello, P., 2010. Association of *Phytophthora*  
911 *cinnamomi* with white oak decline in southern Ohio. Plant Dis. 94, 1026–1034.  
912 <https://doi.org/10.1094/PDIS-94-8-1026>

- 913 O'Hanlon, R., Choiseul, J., Brennan, J.M., Grogan, H., 2018. Assessment of the eradication  
914 measures applied to *Phytophthora ramorum* in Irish *Larix kaempferi* forests. For.  
915 Pathol. 48, 2003–2010. <https://doi.org/10.1111/efp.12389>
- 916 Penczykowski, R.M., Parratt, S.R., Barrès, B., Sallinen, S.K., Laine, A.L., 2018. Manipulating  
917 host resistance structure reveals impact of pathogen dispersal and environmental  
918 heterogeneity on epidemics. Ecology 99, 2853–2863. <https://doi.org/10.1002/ecy.2526>
- 919 Peterson, E., Hansen, E., Kanaskie, A., 2014. Spatial relationship between *Phytophthora*  
920 *ramorum* and roads or streams in Oregon tanoak forests. For. Ecol. Manage. 312, 216–  
921 224. <https://doi.org/10.1016/j.foreco.2013.10.002>
- 922 Plantlife, 2015. The state of Scotland's juniper in 2015. Plantlife, Stirling.
- 923 Purse, B.V, Rogers, D.J., 2009. 16-Bluetongue virus and climate change. Bluetongue 343–  
924 364. <https://doi.org/10.1016/B978-0-12-369368-6.50020-4>
- 925 R Core Team, 2018. R: A language and environment for statistical computing. R Foundation  
926 for Statistical Computing. Vienna, Austria. URL <https://www.R-project.org/>.
- 927 R Core Team, 2017. R: A language and environment for statistical computing. R Foundation  
928 for Statistical Computing. Vienna, Austria. URL <https://www.R-project.org/>.
- 929 Redondo, M.A., Boberg, J., Stenlid, J., Oliva, J., 2018. Contrasting distribution patterns  
930 between aquatic and terrestrial *Phytophthora* species along a climatic gradient are  
931 linked to functional traits. ISME J. 12, 2967–2980.  
932 <https://doi.org/10.1038/s41396-018-0229-3>
- 933 Rodwell, J.S., 1991. British Plant Communities Volumes 1:5. Cambridge University Press,  
934 Cambridge.
- 935 Rue, H., Martino, S., Chopin, N., 2009. Approximate Bayesian inference for latent Gaussian  
936 models by using integrated nested Laplace approximations. J. R. Stat. Soc. Ser. B Stat.  
937 Methodol. 71, 319–392. <https://doi.org/10.1111/j.1467-9868.2008.00700.x>
- 938 Rünk, K., Zobel, M., Zobel, K., 2012. Biological Flora of the British Isles:  
939 *Dryopteris carthusiana*, *D. dilatata* and *D. expansa*. J. Ecol. 100, 1039–1063.  
940 <https://doi.org/10.1111/j.1365-2745.2012.01985.x>

- 941 The Scottish Government, 2016. The Scottish plant health strategy 2016-2021.  
942 <https://www.gov.scot/publications/scottish-plant-health-strategy/>
- 943 [dataset] Scottish Natural Heritage, 2017. National Vegetation Classification.  
944 <https://gateway.snh.gov.uk/natural-spaces/dataset.jsp?dsid=NVC>
- 945 Sullivan, G., 2003. Extent and condition of juniper scrub in Scotland. Scottish Nat. Herit.  
946 Arch. Rep. No. 026, Inverness.
- 947 Tene, A., Broome, A., Connolly, T., 2007. Investigation of the possible causes of dieback of  
948 Glenartney Juniper Wood SAC Perthshire. Project No: 18895. Part 1: age structure  
949 analysis. Report commissioned by Scottish Natural Heritage. Forest Research, Roslin.
- 950 Thomas, P.A., El-Barghathi, M., Polwart, A., 2007. Biological Flora of the British Isles:  
951 *Juniperus communis* L. J. Ecol. 95, 1404–1440.  
952 <https://doi.org/10.1111/j.1365-2745.2007.01308.x>
- 953 Thompson, R.N., Gilligan, C.A., Cunniffe, N.J., 2018. Control fast or control smart: when  
954 should invading pathogens be controlled? PLoS Comput. Biol. 14, 1–21.  
955 <https://doi.org/10.1371/journal.pcbi.1006014>
- 956 Tippett, J.T., McGrath, J.F., Hill, T.C., 1989. Site and seasonal effects on susceptibility of  
957 *Eucalyptus marginata* to *Phytophthora cinnamomi*. Aust. J. Bot. 37, 481–490.  
958 <https://doi.org/10.1071/BT9890481>
- 959 Troy, A., Morgan Grove, J., O’Neil-Dunne, J., 2012. The relationship between tree canopy  
960 and crime rates across an urban–rural gradient in the greater Baltimore region. Landsc.  
961 Urban Plan. 106, 262–270. <https://doi.org/10.1016/J.LANDURBPLAN.2012.03.010>
- 962 Van der Wal, J., Falconi, L., Januchowski, S., Shoo, L., Storlie, C., 2014. SDMTools:  
963 Species Distribution Modelling tools: tools for processing data associated with species  
964 distribution modelling exercises. R package version 1.1-221.1.  
965 <https://CRAN.R-project.org/package=SDMTools>
- 966 Verheyen, K., Adriaenssens, S., Gruwez, R., Michalczyk, I.M., Ward, L.K., Rosseel, Y., Van  
967 den Broeck, A., García, D., 2009. *Juniperus communis*: victim of the combined action of  
968 climate warming and nitrogen deposition? Plant Biol. 11, 49–59.

- 969 <https://doi.org/10.1111/j.1438-8677.2009.00214.x>
- 970 Walker, K.J., Stroh, P.A., Ellis, R.W., 2017. Threatened plants in Britain and Ireland.  
971 Botanical Society of Britain and Ireland, London.
- 972 Ward, L.K., Shellswell, C.H., 2017. Looking after juniper. Plantlife, Salisbury.
- 973 Werres, S., Elliot, M., Greslebin, A.G., 2014. Plant diseases and diagnosis JKI Data Sheets  
974 1–13. <https://doi.org/10.5073/jkidsppd.2014.001>
- 975 Whittome, T., 2010. Report No CASL-0909-129-1a Glenartney Juniper Wood Aerial  
976 Photography 2010. Report commissioned by Scottish Natural Heritage, Inverness.
- 977 Wilkins, T.C., Duckworth, J.C., 2011. Breaking new ground for juniper - a management  
978 handbook for lowland England. Plantlife, Salisbury.
- 979 Zeileis, A., Grothendieck, G., 2005. zoo: S3 infrastructure for regular and irregular time  
980 series. J. Stat. Softw. 14, 1–27. <https://doi.org/10.18637/jss.v014.i06>
- 981
- 982
